# Supplementary material for: CRFK and Primary Macrophages Transcriptomes in Response to Feline Coronavirus Infection Differ Significantly
Source: Front Genet. 2020 Dec 3;11:584744. doi: 10.3389/fgene.2020.584744 (PMC7745755; doi:10.3389/fgene.2020.584744)
Supplement: Supplementary file 11 [file Table_10.XLS]

## Sheet: ClueGO Results
GOID	GOTerm	Ontology Source	Term PValue	Term PValue Corrected with Benjamini-Hochberg	Group PValue	Group PValue Corrected with Benjamini-Hochberg	GOLevels	GOGroups	% Associated Genes	Nr. Genes	Associated Genes Found
GO:0051640	organelle localization	GO_BiologicalProcess-EBI-UniProt-GOA-ACAP-ARAP_16.06.2020_00h00	0.00049701	0.0123436	0.00049701	0.00131561	[3]	Group00	11.3314	40	[ALB, AP3B2, BIN1, BRAT1, CAV2, CCDC141, CCDC155, CDCA5, CDH3, CENPE, CLASP1, CLASP2, FGD4, FGR, HNRNPU, HOOK3, IKBKG, IL13, KIF1B, LOC101086179, LYN, MAP1B, MAPT, MYO1D, MYO5B, MYO5C, NUP98, PCM1, PDPK1, PLXNA2, PTK2, SLC4A5, SPAG9, SPICE1, SPIRE1, SYTL4, TMEM201, TRAK1, UNC13A, XPO1]
GO:0051646	mitochondrion localization	GO_BiologicalProcess-EBI-UniProt-GOA-ACAP-ARAP_16.06.2020_00h00	0.00041066	0.0108466	0.00041066	0.00115498	[4]	Group01	27.5862	8	[ALB, BRAT1, FGD4, KIF1B, MAP1B, MAPT, SLC4A5, TRAK1]
GO:0051649	establishment of localization in cell	GO_BiologicalProcess-EBI-UniProt-GOA-ACAP-ARAP_16.06.2020_00h00	0.00303305	0.0400556	0.00303305	0.00426523	[3]	Group02	8.3815	116	[ABCD3, AP2M1, AP3B2, AP5M1, APBA1, APBA2, ARNTL, ASPSCR1, BIN1, BRSK2, C2CD5, CACNB2, CAPN3, CCDC155, CCDC91, CCDC93, CD36, CDCA5, CDH3, CENPE, CHM, CLASP1, CLASP2, CLIP1, DENND1B, DYNC1I2, DYNC2H1, EPS15L1, EXPH5, FGR, FYTTD1, HACL1, HNRNPU, HOOK2, HOOK3, ICK, IFT140, IKBKG, IL13, ITGAM, ITGB3, ITSN2, KCNJ10, KCNJ2, KCNQ1, KIF1A, KIF1B, LMAN2L, LYN, MAK, MAP1B, MAPK8IP3, MCM3AP, MFF, MPPE1, MYO…
GO:0090557	establishment of endothelial intestinal barrier	GO_BiologicalProcess-EBI-UniProt-GOA-ACAP-ARAP_16.06.2020_00h00	0.00482737	0.0492807	0.00482737	0.00482737	[7, 8, 9]	Group03	50	3	[F11R, PTPRS, RAPGEF2]
GO:0097110	scaffold protein binding	GO_MolecularFunction-EBI-UniProt-GOA-ACAP-ARAP_16.06.2020_00h00	0.00141242	0.0225987	0.00141242	0.00264828	[3]	Group04	25.9259	7	[CACNA1H, CIT, DLG4, KCNQ1, MDM2, SCN5A, SRC]
GO:0098590	plasma membrane region	GO_CellularComponent-EBI-UniProt-GOA-ACAP-ARAP_16.06.2020_00h00	0.000596532	0.0141804	0.000596532	0.00149133	[3, 4]	Group05	10.0503	60	[ABCC2, ABCC5, ADAM22, AMOTL2, AP2M1, APBA1, ATP7B, BMX, C2CD5, CAV2, CD36, CHRNG, CIT, CRB2, DDX58, DLG4, EPB41, EPS15L1, EPS8, EPS8L1, EPS8L2, FGR, FN1, FXYD6, GPHN, GRIN1, IDE, ITGAM, ITGB3, ITSN2, KCNJ10, KCNMA1, KCNQ1, MAPK8IP3, MAPT, MYLK, MYOF, P2RX1, PALM, PDGFB, PDPN, PLPP1, PTK2, PTPRS, RAPGEF2, SCN2A, SCN5A, SCNN1A, SLC11A2, SLC4A11, SLC4A5, SLC4A8, SLCO1C1, SRC, TBC1D5, TRPM6, TSHR, U…
GO:0140030	modification-dependent protein binding	GO_MolecularFunction-EBI-UniProt-GOA-ACAP-ARAP_16.06.2020_00h00	0.00116148	0.0201322	0.00116148	0.00237575	[3]	Group06	15.3846	16	[ANKRD13D, CDYL, DAXX, IDE, IKBKG, LOC102899716, LYN, MBTD1, NCAPG2, OTUD7B, RAD18, SMARCA4, TDRD3, ZMYND8, ZRANB1, ZRANB3]
GO:0005543	phospholipid binding	GO_MolecularFunction-EBI-UniProt-GOA-ACAP-ARAP_16.06.2020_00h00	0.0044618	0.0491685	0.0044618	0.00501953	[3, 4]	Group07	10.5769	33	[ANXA9, ARHGAP26, BIN1, C2CD5, DENND1B, EEA1, EPB41, FERMT2, GRAMD1B, KCNJ2, KCNQ1, KIF16B, LOC101091160, LPAR1, MYOF, NISCH, PITPNC1, PLA2G4A, PLA2G4E, PLEKHA4, PLEKHA5, PLEKHF1, PXK, RAPGEF2, RASA2, SESTD1, SH3PXD2A, SYT2, SYT3, SYTL4, TECPR1, UNC13A, VPS39]
GO:0008432	JUN kinase binding	GO_MolecularFunction-EBI-UniProt-GOA-ACAP-ARAP_16.06.2020_00h00	0.00482737	0.0492807	0.00482737	0.00482737	[6]	Group08	50	3	[MAPK8IP3, PTK2, SPAG9]
GO:0010458	exit from mitosis	GO_BiologicalProcess-EBI-UniProt-GOA-ACAP-ARAP_16.06.2020_00h00	0.000987168	0.0184567	0.000987168	0.00222113	[5, 6, 8]	Group09	38.4615	5	[CDC14B, CDCA5, CTDP1, EPS8, MAD2L1BP]
GO:0010572	positive regulation of platelet activation	GO_BiologicalProcess-EBI-UniProt-GOA-ACAP-ARAP_16.06.2020_00h00	0.00253717	0.0346053	0.00253717	0.00380575	[4, 5, 6, 7, 8, 9]	Group10	60	3	[F11R, PDPN, PLA2G4A]
GO:0043229	intracellular organelle	GO_CellularComponent-EBI-UniProt-GOA-ACAP-ARAP_16.06.2020_00h00	0.00473432	0.0492369	0.00473432	0.00484191	[2, 3]	Group11	7.04122	574	[ABCD3, ABLIM3, ACACA, ACP2, ADARB1, ADGRB2, AFAP1, AFF2, AFMID, AGAP2, AGFG1, AKAP6, ALB, ALDH18A1, ALDH1B1, AMOTL2, ANHX, ANLN, ANO10, ANXA9, AP2M1, AP5M1, APBA1, APBA2, APBB2, ARHGEF10, ARMC9, ARNT2, ARNTL, ASPSCR1, ASXL1, ATE1, ATF1, ATL1, ATL2, ATP11B, ATP11C, ATP2B4, ATP7B, ATP9A, AURKB, AVPR2, B4GALNT4, BBX, BCL2A1, BCL9, BFSP1, BIN1, BMS1, BMX, BNIPL, BRAT1, BRCA1, BRCA2, BRSK2, BRWD3, C2…
GO:0002116	semaphorin receptor complex	GO_CellularComponent-EBI-UniProt-GOA-ACAP-ARAP_16.06.2020_00h00	0.00482737	0.0492807	0.00482737	0.00482737	[3]	Group12	50	3	[PLXNA2, PLXNB1, PLXNB3]
GO:0003721	telomerase RNA reverse transcriptase activity	GO_BiologicalProcess-EBI-UniProt-GOA-ACAP-ARAP_16.06.2020_00h00	0.000280488	0.00880627	0.000280488	0.000841464	[8, 9, 10, 11]	Group13	100	3	[HNRNPD, PARP3, TERT]
GO:0030048	actin filament-based movement	GO_BiologicalProcess-EBI-UniProt-GOA-ACAP-ARAP_16.06.2020_00h00	0.00460522	0.0488095	0.00460522	0.00481941	[3]	Group14	15.3846	12	[BIN1, CACNB2, KCNJ2, KCNQ1, MYO1D, MYO5B, MYO5C, MYO9B, PDE4D, PDPN, SCN5A, WIPF2]
GO:0030315	T-tubule	GO_CellularComponent-EBI-UniProt-GOA-ACAP-ARAP_16.06.2020_00h00	0.00234146	0.0324682	0.00234146	0.00390243	[2, 5]	Group15	27.2727	6	[ATP2B4, BIN1, CACNB2, PPP3CB, SCN2A, SCN5A]
GO:0031234	extrinsic component of cytoplasmic side of plasma membrane	GO_CellularComponent-EBI-UniProt-GOA-ACAP-ARAP_16.06.2020_00h00	0.000629076	0.0145386	0.000629076	0.00148992	[2, 4, 5, 6]	Group16	18.3099	13	[CAV2, DLG4, FERMT2, FGR, GNAL, GNAQ, GNB4, KCNAB1, LYN, PLEKHA4, SRC, TIAM1, TNK2]
GO:0031435	mitogen-activated protein kinase kinase kinase binding	GO_MolecularFunction-EBI-UniProt-GOA-ACAP-ARAP_16.06.2020_00h00	0.0027948	0.0375044	0.0027948	0.00405697	[6]	Group17	40	4	[LOC101091160, MAP3K11, MAPK8IP3, TCF3]
GO:0043425	bHLH transcription factor binding	GO_MolecularFunction-EBI-UniProt-GOA-ACAP-ARAP_16.06.2020_00h00	0.00136151	0.0222113	0.00136151	0.00266383	[5]	Group18	30	6	[ARNTL, NCAPG2, RUNX2, TCF12, TCF3, TCF4]
GO:0032060	bleb assembly	GO_BiologicalProcess-EBI-UniProt-GOA-ACAP-ARAP_16.06.2020_00h00	0.0027948	0.0375044	0.0027948	0.00405697	[7]	Group19	40	4	[ANLN, LPAR1, MYLK, P2RX7]
GO:0033194	response to hydroperoxide	GO_BiologicalProcess-EBI-UniProt-GOA-ACAP-ARAP_16.06.2020_00h00	0.00176815	0.0269927	0.00176815	0.00318268	[4]	Group20	44.4444	4	[CD36, OXR1, RNF112, TRPM2]
GO:0044304	main axon	GO_CellularComponent-EBI-UniProt-GOA-ACAP-ARAP_16.06.2020_00h00	0.00401998	0.0467779	0.00401998	0.0047605	[2, 6]	Group21	21.875	7	[DLG4, KCNAB1, KCNQ2, MAPK8IP3, MAPT, RCAN3, SCN2A]
GO:0050892	intestinal absorption	GO_BiologicalProcess-EBI-UniProt-GOA-ACAP-ARAP_16.06.2020_00h00	0.00234146	0.0324682	0.00234146	0.00390243	[4]	Group22	27.2727	6	[CD36, EPB41, F11R, GCNT3, KCNQ1, NPC1L1]
GO:0035864	response to potassium ion	GO_BiologicalProcess-EBI-UniProt-GOA-ACAP-ARAP_16.06.2020_00h00	0.00253717	0.0346053	0.00253717	0.00380575	[5]	Group23	60	3	[CACNA1H, CARF, DLG4]
GO:0035865	cellular response to potassium ion	GO_BiologicalProcess-EBI-UniProt-GOA-ACAP-ARAP_16.06.2020_00h00	0.00253717	0.0346053	0.00253717	0.00380575	[6]	Group23	60	3	[CACNA1H, CARF, DLG4]
GO:0062207	regulation of pattern recognition receptor signaling pathway	GO_BiologicalProcess-EBI-UniProt-GOA-ACAP-ARAP_16.06.2020_00h00	0.0031415	0.0402112	0.0031415	0.00415787	[4, 5, 6]	Group24	17.8571	10	[CD36, IRF1, LOC101091160, LYN, PDPK1, PTPRS, PUM1, RTN4, TIRAP, TLR3]
GO:0034121	regulation of toll-like receptor signaling pathway	GO_BiologicalProcess-EBI-UniProt-GOA-ACAP-ARAP_16.06.2020_00h00	0.00134114	0.0220956	0.0031415	0.00415787	[5, 6, 7]	Group24	21.4286	9	[CD36, IRF1, LOC101091160, LYN, PDPK1, PTPRS, RTN4, TIRAP, TLR3]
GO:0030522	intracellular receptor signaling pathway	GO_BiologicalProcess-EBI-UniProt-GOA-ACAP-ARAP_16.06.2020_00h00	0.00347718	0.0425443	0.00234873	0.00377475	[3, 4, 5]	Group25	12.6582	20	[ALDH1A2, ALPK1, ARNTL, ASXL1, BRCA1, DAXX, DDX58, KANK2, NCOR1, NR2C1, PPARD, PPARG, PUM1, RBFOX2, RNF6, RORA, RXRA, SMARCA4, SRC, ZNF536]
GO:0071407	cellular response to organic cyclic compound	GO_BiologicalProcess-EBI-UniProt-GOA-ACAP-ARAP_16.06.2020_00h00	0.00464779	0.0489489	0.00234873	0.00377475	[5]	Group25	10.3858	35	[ADCY6, AKAP6, ARNTL, ATP2B4, BRCA1, CAV2, DAXX, DDX58, GNAL, GNAQ, GRAMD1B, IL18, KANK2, KCNQ1, NCOR1, NR1H3, NR2C1, P2RX7, P2RY1, P2RY6, PALM, PDGFB, PPARD, PPARG, RAPGEF2, RBFOX2, RNF6, RORA, RXRA, SLC5A5, SMAD9, SMARCA4, SRC, TRPM2, URI1]
GO:0045180	basal cortex	GO_CellularComponent-EBI-UniProt-GOA-ACAP-ARAP_16.06.2020_00h00	0.00253717	0.0346053	0.00177812	0.00307752	[3, 5]	Group26	60	3	[CLASP1, CLASP2, PHLDB1]
GO:0099738	cell cortex region	GO_CellularComponent-EBI-UniProt-GOA-ACAP-ARAP_16.06.2020_00h00	0.00177812	0.0268981	0.00177812	0.00307752	[4]	Group26	25	7	[ANLN, CLASP1, CLASP2, EPB41, EPB41L2, PHLDB1, UNC13A]
GO:1902495	transmembrane transporter complex	GO_CellularComponent-EBI-UniProt-GOA-ACAP-ARAP_16.06.2020_00h00	0.00332331	0.0415789	0.00332331	0.00427283	[3, 4, 5]	Group27	11.7371	25	[AKAP6, ATP1B2, BEST1, CACNA1H, CACNA2D3, CACNB2, CHRNG, DLG4, EPS8, KCNA2, KCNAB1, KCNJ2, KCNMA1, KCNQ1, KCNQ2, LRRC8B, LRRC8E, PHLPP2, PORCN, SCN2A, SCN3A, SCN5A, SCNN1A, SESTD1, TRPC1]
GO:0034702	ion channel complex	GO_CellularComponent-EBI-UniProt-GOA-ACAP-ARAP_16.06.2020_00h00	0.00338997	0.0420964	0.00332331	0.00427283	[4, 5, 6]	Group27	11.8812	24	[AKAP6, BEST1, CACNA1H, CACNA2D3, CACNB2, CHRNG, DLG4, EPS8, KCNA2, KCNAB1, KCNJ2, KCNMA1, KCNQ1, KCNQ2, LRRC8B, LRRC8E, PHLPP2, PORCN, SCN2A, SCN3A, SCN5A, SCNN1A, SESTD1, TRPC1]
GO:0098826	endoplasmic reticulum tubular network membrane	GO_CellularComponent-EBI-UniProt-GOA-ACAP-ARAP_16.06.2020_00h00	0.00106697	0.0195104	0.00253717	0.00380575	[3]	Group28	75	3	[ATL1, ATL2, RTN4]
GO:1990809	endoplasmic reticulum tubular network membrane organization	GO_BiologicalProcess-EBI-UniProt-GOA-ACAP-ARAP_16.06.2020_00h00	0.00106697	0.0195104	0.00253717	0.00380575	[5, 7]	Group28	75	3	[ATL1, ATL2, RTN4]
GO:0001837	epithelial to mesenchymal transition	GO_BiologicalProcess-EBI-UniProt-GOA-ACAP-ARAP_16.06.2020_00h00	0.00308623	0.03981	0.00308623	0.00420849	[5, 6, 7, 8]	Group29	15.4762	13	[ACVR1, CRB2, DLG5, ELL3, LDLRAD4, LOC101091160, LOXL3, PDPN, PHLDB1, RTN4, TCF7L2, TIAM1, TRIM62]
GO:0010717	regulation of epithelial to mesenchymal transition	GO_BiologicalProcess-EBI-UniProt-GOA-ACAP-ARAP_16.06.2020_00h00	0.00359116	0.0433021	0.00308623	0.00420849	[4, 5, 6, 7, 8, 9]	Group29	17.5439	10	[ACVR1, CRB2, ELL3, LDLRAD4, LOC101091160, PDPN, PHLDB1, TCF7L2, TIAM1, TRIM62]
GO:0014848	urinary tract smooth muscle contraction	GO_BiologicalProcess-EBI-UniProt-GOA-ACAP-ARAP_16.06.2020_00h00	0.00253717	0.0346053	0.00253717	0.00380575	[6]	Group30	60	3	[ATP2B4, KCNMA1, TRPV1]
GO:0014832	urinary bladder smooth muscle contraction	GO_BiologicalProcess-EBI-UniProt-GOA-ACAP-ARAP_16.06.2020_00h00	0.00253717	0.0346053	0.00253717	0.00380575	[7]	Group30	60	3	[ATP2B4, KCNMA1, TRPV1]
GO:0016502	nucleotide receptor activity	GO_MolecularFunction-EBI-UniProt-GOA-ACAP-ARAP_16.06.2020_00h00	0.00380959	0.044642	0.00380959	0.00476199	[4]	Group31	29.4118	5	[P2RX1, P2RX5, P2RX7, P2RY1, P2RY6]
GO:0001614	purinergic nucleotide receptor activity	GO_BiologicalProcess-EBI-UniProt-GOA-ACAP-ARAP_16.06.2020_00h00	0.00380959	0.044642	0.00380959	0.00476199	[5, 6, 7]	Group31	29.4118	5	[P2RX1, P2RX5, P2RX7, P2RY1, P2RY6]
GO:0005635	nuclear envelope	GO_CellularComponent-EBI-UniProt-GOA-ACAP-ARAP_16.06.2020_00h00	0.00413729	0.046833	0.00413729	0.0047738	[3, 4, 5, 6]	Group32	11.0266	29	[AKAP6, BIN1, CCDC155, CLIP1, DPY19L4, EPC1, ITGB4, MAD2L1BP, MCM3AP, NUDT9, NUP153, NUP210L, NUP98, OSBPL6, P2RX1, P2RX5, P2RX7, PCM1, PHF11, PHF20, PLA2G4A, PLCD4, PRICKLE1, RANBP3L, RAP1GAP2, RNF6, RTN4, TMEM201, XPO1]
GO:0031965	nuclear membrane	GO_CellularComponent-EBI-UniProt-GOA-ACAP-ARAP_16.06.2020_00h00	0.000171849	0.0060842	0.00413729	0.0047738	[4, 5, 6, 7]	Group32	14.9351	23	[AKAP6, CCDC155, DPY19L4, EPC1, ITGB4, MAD2L1BP, MCM3AP, NUDT9, NUP153, NUP98, OSBPL6, P2RX1, P2RX5, P2RX7, PCM1, PHF11, PHF20, PLCD4, PRICKLE1, RAP1GAP2, RNF6, TMEM201, XPO1]
GO:0010314	phosphatidylinositol-5-phosphate binding	GO_MolecularFunction-EBI-UniProt-GOA-ACAP-ARAP_16.06.2020_00h00	0.000395783	0.0109764	0.00387723	0.00471555	[6, 7]	Group33	45.4545	5	[PLA2G4A, PLEKHA5, PLEKHF1, SESTD1, SH3PXD2A]
GO:0032266	phosphatidylinositol-3-phosphate binding	GO_MolecularFunction-EBI-UniProt-GOA-ACAP-ARAP_16.06.2020_00h00	0.000671438	0.0150983	0.00387723	0.00471555	[6, 7]	Group33	25.8065	8	[LOC101091160, PLA2G4A, PLEKHA4, PLEKHA5, PLEKHF1, SESTD1, SH3PXD2A, TECPR1]
GO:0070273	phosphatidylinositol-4-phosphate binding	GO_MolecularFunction-EBI-UniProt-GOA-ACAP-ARAP_16.06.2020_00h00	0.000730154	0.0157789	0.00387723	0.00471555	[6, 7]	Group33	33.3333	6	[LOC101091160, PLA2G4A, PLEKHA5, PLEKHF1, SESTD1, SH3PXD2A]
GO:0006811	ion transport	GO_BiologicalProcess-EBI-UniProt-GOA-ACAP-ARAP_16.06.2020_00h00	0.00453486	0.0483718	0.00453486	0.00485877	[4]	Group34	8.42975	102	[ABCC2, ABCC5, ABCD3, AKAP6, ANO10, ANO9, ANXA9, APBA1, ATP11B, ATP11C, ATP1A4, ATP1B2, ATP2B4, ATP7B, ATP9A, BEST1, BIN1, CACNA1H, CACNA2D3, CACNB2, CAMK2G, CAPN3, CASP6, CD36, CHRNG, CNNM4, EPB41, FGF13, FHL1, FXYD6, GRIN1, ITGB3, KCNA2, KCNAB1, KCNJ10, KCNJ12, KCNJ2, KCNMA1, KCNQ1, KCNQ2, LOC101085489, LRRC8B, LRRC8E, LYN, MYLK, NEDD4L, NIPA1, OC90, P2RX1, P2RX5, P2RX7, P2RY1, P2RY6, PDGFB, PD…
GO:0072511	divalent inorganic cation transport	GO_BiologicalProcess-EBI-UniProt-GOA-ACAP-ARAP_16.06.2020_00h00	0.00228862	0.0320021	0.00453486	0.00485877	[6]	Group34	11.0368	33	[ANXA9, ATP2B4, ATP7B, BIN1, CACNA1H, CACNA2D3, CACNB2, CAMK2G, CAPN3, CNNM4, EPB41, KCNJ2, LYN, MYLK, NIPA1, P2RX1, P2RX7, PDGFB, PDPK1, PLCD3, PLCD4, PLCL2, SESTD1, SLC11A2, SLC24A1, SLC39A10, STC2, TMEM165, TPCN2, TRPC1, TRPM2, TRPV1, TSPOAP1]
GO:0070838	divalent metal ion transport	GO_BiologicalProcess-EBI-UniProt-GOA-ACAP-ARAP_16.06.2020_00h00	0.00403161	0.0465875	0.00453486	0.00485877	[7]	Group34	10.7383	32	[ANXA9, ATP2B4, BIN1, CACNA1H, CACNA2D3, CACNB2, CAMK2G, CAPN3, CNNM4, EPB41, KCNJ2, LYN, MYLK, NIPA1, P2RX1, P2RX7, PDGFB, PDPK1, PLCD3, PLCD4, PLCL2, SESTD1, SLC11A2, SLC24A1, SLC39A10, STC2, TMEM165, TPCN2, TRPC1, TRPM2, TRPV1, TSPOAP1]
GO:0032432	actin filament bundle	GO_CellularComponent-EBI-UniProt-GOA-ACAP-ARAP_16.06.2020_00h00	0.0023767	0.0326846	0.0023767	0.00368799	[2, 6, 7]	Group35	18.5185	10	[ABLIM3, FERMT2, LDB3, LIMCH1, MYLK, NEBL, PALLD, PLS3, PTK2, TPM3]
GO:0097517	contractile actin filament bundle	GO_CellularComponent-EBI-UniProt-GOA-ACAP-ARAP_16.06.2020_00h00	0.00409671	0.0466913	0.0023767	0.00368799	[3, 7, 8]	Group35	18.3673	9	[ABLIM3, FERMT2, LDB3, LIMCH1, MYLK, NEBL, PALLD, PTK2, TPM3]
GO:0001725	stress fiber	GO_CellularComponent-EBI-UniProt-GOA-ACAP-ARAP_16.06.2020_00h00	0.00409671	0.0466913	0.0023767	0.00368799	[3, 4, 7, 8, 9]	Group35	18.3673	9	[ABLIM3, FERMT2, LDB3, LIMCH1, MYLK, NEBL, PALLD, PTK2, TPM3]
GO:0042578	phosphoric ester hydrolase activity	GO_MolecularFunction-EBI-UniProt-GOA-ACAP-ARAP_16.06.2020_00h00	0.00224845	0.0317069	0.00110671	0.00237153	[4]	Group36	10.158	45	[ACP2, ARFGEF3, CDC14B, CDKN3, CTDP1, CTDSPL, DUSP8, GDPD3, INPP5E, INPP5K, LOC101082222, LOC101092674, LPAR1, MPPE1, MTMR1, MTMR3, MYO1D, NT5C3A, OCRL, PDE4D, PDE7A, PHACTR1, PHLPP2, PLCD3, PLCD4, PLCL2, PLCXD2, PLPP1, PLPP3, PPP3CB, PPP4R4, PTP4A3, PTPRE, PTPRF, PTPRS, PXYLP1, RCAN1, RCAN3, SBF1, SBF2, SEMA4D, SFI1, SLC39A10, TDP1, URI1]
GO:0016311	dephosphorylation	GO_BiologicalProcess-EBI-UniProt-GOA-ACAP-ARAP_16.06.2020_00h00	0.00374547	0.0445176	0.00110671	0.00237153	[5]	Group36	10.2362	39	[ACP2, ARFGEF3, CDC14B, CDCA2, CDKN3, CTDP1, CTDSPL, CTTNBP2NL, DUSP8, FBXW11, INPP5E, INPP5K, LOC101082222, LOC101092674, MTMR1, MTMR3, MYO1D, NT5C3A, OCRL, PHACTR1, PHLPP2, PLPP1, PLPP3, PPP3CB, PPP4R4, PTP4A3, PTPRE, PTPRF, PTPRS, PXYLP1, RCAN1, RCAN3, SBF1, SBF2, SEMA4D, SFI1, SLC39A10, SRC, URI1]
GO:0004722	protein serine/threonine phosphatase activity	GO_BiologicalProcess-EBI-UniProt-GOA-ACAP-ARAP_16.06.2020_00h00	0.0013835	0.0223509	0.00110671	0.00237153	[8, 9]	Group36	18.6441	11	[CDC14B, CDKN3, CTDP1, CTDSPL, LOC101092674, MTMR3, PHLPP2, PPP3CB, PPP4R4, RCAN1, RCAN3]
GO:0007018	microtubule-based movement	GO_BiologicalProcess-EBI-UniProt-GOA-ACAP-ARAP_16.06.2020_00h00	0.000681218	0.015114	0.000109496	0.000351952	[3]	Group37	12.9353	26	[AP3B2, CENPE, DNHD1, DYNC1I2, DYNC2H1, HYDIN, ICK, IFT140, KIF11, KIF16B, KIF1A, KIF1B, KIF27, KIF9, KIFC3, MAK, MAP1B, MAPK8IP3, MBD1, PCM1, TEKT1, TMEM201, TRAK1, TTC21A, TTC26, WDR19]
GO:0003774	motor activity	GO_MolecularFunction-EBI-UniProt-GOA-ACAP-ARAP_16.06.2020_00h00	0.000799582	0.0166313	0.000109496	0.000351952	[7]	Group37	15	18	[CENPE, DNHD1, DYNC1I2, DYNC2H1, KIF11, KIF16B, KIF1A, KIF1B, KIF27, KIF9, KIFC3, LRRC49, MYO10, MYO1D, MYO5B, MYO5C, MYO9A, MYO9B]
GO:1990939	ATP-dependent microtubule motor activity	GO_MolecularFunction-EBI-UniProt-GOA-ACAP-ARAP_16.06.2020_00h00	0.00469582	0.0491437	0.000109496	0.000351952	[8, 9]	Group37	24	6	[DYNC1I2, DYNC2H1, KIF11, KIF16B, KIF1A, KIFC3]
GO:0023051	regulation of signaling	GO_BiologicalProcess-EBI-UniProt-GOA-ACAP-ARAP_16.06.2020_00h00	0.00440508	0.0495274	4.08499e-05	0.000141404	[2, 3]	Group38	7.89109	171	[AAK1, ACVR1, AFAP1, AGAP2, ALPK1, APBA1, APBA2, ARFGEF3, ARHGAP26, ARHGEF10, ARHGEF3, ARMC9, ARNTL, ARR3, ASXL1, ATP2B4, BEGAIN, BRCA1, BRSK2, CACNB2, CAPN3, CARD8, CAV2, CCNY, CD2H10orf71, CD36, CDH3, CDK12, CDON, CILP, CMKLR1, CRB2, CSNK1A1, DDX58, DLG4, DLG5, DUSP8, DYNC2H1, DYRK3, ELL3, EPHB1, EPS8, EPS8L1, EPS8L2, F11R, FBXW11, FGFR4, FGR, FN1, FSTL4, GALNT11, GHSR, GLMN, GNAQ, GPR137C, GRB…
GO:0010646	regulation of cell communication	GO_BiologicalProcess-EBI-UniProt-GOA-ACAP-ARAP_16.06.2020_00h00	0.00441525	0.0489799	4.08499e-05	0.000141404	[3, 4]	Group38	7.89596	170	[AAK1, ACVR1, AFAP1, AGAP2, ALPK1, APBA1, APBA2, ARFGEF3, ARHGAP26, ARHGEF10, ARHGEF3, ARMC9, ARNTL, ARR3, ASXL1, ATP2B4, BEGAIN, BRCA1, BRSK2, CACNB2, CAPN3, CARD8, CAV2, CCNY, CD2H10orf71, CD36, CDH3, CDK12, CDON, CILP, CMKLR1, CRB2, CSNK1A1, DDX58, DLG4, DLG5, DUSP8, DYNC2H1, DYRK3, ELL3, EPHB1, EPS8, EPS8L1, EPS8L2, F11R, FBXW11, FGFR4, FGR, FN1, FSTL4, GALNT11, GHSR, GLMN, GNAQ, GPR137C, GRB…
GO:0009966	regulation of signal transduction	GO_BiologicalProcess-EBI-UniProt-GOA-ACAP-ARAP_16.06.2020_00h00	0.00307563	0.0399833	4.08499e-05	0.000141404	[3, 4, 5]	Group38	8.09783	149	[AAK1, ACVR1, AFAP1, AGAP2, ALPK1, ARFGEF3, ARHGAP26, ARHGEF10, ARHGEF3, ARMC9, ARNTL, ARR3, ASXL1, ATP2B4, BEGAIN, BRCA1, CAPN3, CARD8, CAV2, CCNY, CD2H10orf71, CD36, CDH3, CDK12, CDON, CILP, CMKLR1, CRB2, CSNK1A1, DLG5, DUSP8, DYNC2H1, DYRK3, ELL3, EPHB1, EPS8, EPS8L1, EPS8L2, F11R, FBXW11, FGFR4, FGR, FN1, FSTL4, GALNT11, GHSR, GNAQ, GPR137C, GRB10, HIPK1, HNF1B, HNRNPK, IFT140, IGF2, IKBKG, I…
GO:0035556	intracellular signal transduction	GO_BiologicalProcess-EBI-UniProt-GOA-ACAP-ARAP_16.06.2020_00h00	1.43916e-05	0.0010412	4.08499e-05	0.000141404	[3, 4, 5]	Group38	8.96936	161	[ADCY6, ADGRB2, ADGRL2, ALPK1, AMOTL2, ARFGEF3, ARHGAP26, ARHGEF10, ARHGEF11, ARHGEF3, ARNTL, ATP2B4, AVPR2, BCL2A1, BMX, BRCA1, BRCA2, BRSK2, CAPN3, CARD8, CAV2, CD2H10orf71, CD36, CDC42BPG, CDC42EP4, CDK12, CDON, CHEK2, CHM, CHUK, CIT, CMKLR1, CXCR2, DDX58, DLG5, DOCK10, DOCK9, DUSP8, DYRK3, ELL3, EPHB1, EPS8, EPS8L1, EPS8L2, F11R, FARP2, FBXW11, FGF13, FGFR4, FGR, FN1, GNAL, GPR137C, GRB10, GU…
GO:1902531	regulation of intracellular signal transduction	GO_BiologicalProcess-EBI-UniProt-GOA-ACAP-ARAP_16.06.2020_00h00	0.000779658	0.0164222	4.08499e-05	0.000141404	[4, 5, 6]	Group38	9.06433	93	[ALPK1, ARFGEF3, ARHGAP26, ARHGEF10, ARHGEF3, ARNTL, ATP2B4, CAPN3, CARD8, CAV2, CD2H10orf71, CD36, CDK12, CDON, CMKLR1, DLG5, DUSP8, DYRK3, ELL3, EPHB1, EPS8, EPS8L1, EPS8L2, F11R, FBXW11, FGFR4, FGR, FN1, GPR137C, HNRNPK, IGF2, IKBKG, IL18, INPP5K, IRAK4, KANK2, LOC101086801, LOC101091160, LPAR1, LYN, MAP3K11, MAPK8IP3, MAPKBP1, MAPT, MDM2, MYO9B, NACC2, NCOR1, NDRG2, NEK10, NPRL3, OTUD7B, P2RX…
GO:0032587	ruffle membrane	GO_CellularComponent-EBI-UniProt-GOA-ACAP-ARAP_16.06.2020_00h00	0.000403527	0.0110077	4.44019e-06	1.66507e-05	[3, 4, 5, 6]	Group39	25	9	[BMX, C2CD5, DDX58, EPS8, EPS8L1, EPS8L2, FGR, SRC, VPS39]
GO:0005088	Ras guanyl-nucleotide exchange factor activity	GO_BiologicalProcess-EBI-UniProt-GOA-ACAP-ARAP_16.06.2020_00h00	9.23647e-06	0.000853861	4.44019e-06	1.66507e-05	[5]	Group39	20.9302	18	[ARHGEF10, ARHGEF11, ARHGEF3, CCPG1, DENND1B, DENND4C, EPS8, EPS8L1, EPS8L2, FARP2, FGD4, PLEKHG2, PLEKHG5, RAPGEF2, RAPGEF4, SBF1, SBF2, TIAM1]
GO:0005089	Rho guanyl-nucleotide exchange factor activity	GO_BiologicalProcess-EBI-UniProt-GOA-ACAP-ARAP_16.06.2020_00h00	1.74375e-05	0.00107467	4.44019e-06	1.66507e-05	[6]	Group39	27.2727	12	[ARHGEF10, ARHGEF11, ARHGEF3, CCPG1, EPS8, EPS8L1, EPS8L2, FARP2, FGD4, PLEKHG2, PLEKHG5, TIAM1]
GO:0017048	Rho GTPase binding	GO_MolecularFunction-EBI-UniProt-GOA-ACAP-ARAP_16.06.2020_00h00	0.000382452	0.0107864	4.44019e-06	1.66507e-05	[7]	Group39	15.9292	18	[ANLN, ARHGEF10, ARHGEF11, ARHGEF3, CCPG1, CDC42EP4, EPS8, EPS8L1, EPS8L2, FARP2, FGD4, FMNL2, MYO9B, NCKAP1, OCRL, PLEKHG2, PLEKHG5, TIAM1]
GO:0030676	Rac guanyl-nucleotide exchange factor activity	GO_BiologicalProcess-EBI-UniProt-GOA-ACAP-ARAP_16.06.2020_00h00	0.00145325	0.0228133	4.44019e-06	1.66507e-05	[7]	Group39	35.7143	5	[EPS8, EPS8L1, EPS8L2, FARP2, TIAM1]
GO:0051128	regulation of cellular component organization	GO_BiologicalProcess-EBI-UniProt-GOA-ACAP-ARAP_16.06.2020_00h00	0.000379538	0.0108888	5.57812e-08	6.27538e-07	[3, 4]	Group40	8.69854	131	[AAK1, ADGRB2, AFAP1, ANKRD13D, ANLN, APBB2, ARHGEF10, AURKB, BIN1, BRAT1, BRCA1, BRSK2, C2CD5, CAMK2G, CAMKV, CAMSAP2, CCP110, CD36, CDC14B, CDC42EP4, CDCA5, CENPE, CEP250, CKAP5, CLASP1, CLASP2, CLIP1, CNTROB, CTCF, DCUN1D3, DDR2, DLG5, EIF4G1, EPHB1, EPS8, EPS8L1, EPS8L2, EVL, F11R, FARP2, FGD4, FGFR4, FHL1, FHOD1, FN1, FSTL4, GHSR, HMBOX1, HNRNPD, HNRNPK, HNRNPU, IFT140, IGSF9, ITGB3, ITSN2, …
GO:0097435	supramolecular fiber organization	GO_BiologicalProcess-EBI-UniProt-GOA-ACAP-ARAP_16.06.2020_00h00	0.000907482	0.0179768	5.57812e-08	6.27538e-07	[4]	Group40	10.2823	51	[ABI2, AGFG1, ARHGEF10, BIN1, CAMSAP2, CAPN3, CCDC155, CD36, CDC42EP4, CKAP5, CLIP1, CLIP2, DDR2, EPS8, EVL, F11R, FHOD1, GHSR, HOOK2, HOOK3, KANK1, KIAA1211, LDB3, LIMCH1, LOXL3, LPAR1, MAP1B, MAPT, MDM2, MICAL3, MYO1D, MYO5B, MYO5C, NCKAP1, NEBL, PCM1, PHACTR1, PLEKHG2, PLS3, RAC2, SERPINH1, SH3KBP1, SORBS2, SORBS3, SPIRE1, SRC, TPM2, TPM3, TTBK2, TUBGCP5, WIPF2]
GO:0007010	cytoskeleton organization	GO_BiologicalProcess-EBI-UniProt-GOA-ACAP-ARAP_16.06.2020_00h00	4.24911e-09	1.76763e-06	5.57812e-08	6.27538e-07	[5]	Group40	11.334	113	[ABI2, ABLIM3, AFAP1, AGFG1, AMOTL2, ANLN, ARFGEF3, ARHGAP26, ARHGEF10, AURKB, BIN1, BRCA1, BRCA2, BRSK2, BRWD3, CAMSAP2, CAPN3, CC2D2A, CCDC120, CCDC155, CCDC66, CCP110, CDC14B, CDC42BPG, CDC42EP4, CENPE, CEP250, CHEK2, CIT, CKAP5, CLASP1, CLASP2, CLIP1, CLIP2, CNTROB, CSNK1A1, EHBP1, EML4, EPB41, EPB41L2, EPS8, EVL, F11R, FARP2, FGD4, FHOD1, FMNL2, GHSR, HAUS3, HAUS5, HNRNPU, HOOK2, HOOK3, HYDI…
GO:0051493	regulation of cytoskeleton organization	GO_BiologicalProcess-EBI-UniProt-GOA-ACAP-ARAP_16.06.2020_00h00	0.00452536	0.0485819	5.57812e-08	6.27538e-07	[5, 6]	Group40	10.1877	38	[AFAP1, ARHGEF10, BIN1, CAMSAP2, CCP110, CDC42EP4, CEP250, CKAP5, CLASP1, CLASP2, CLIP1, EPS8, EVL, F11R, FHOD1, HNRNPU, ITGB3, KANK1, KIAA1211, KIF11, LIMCH1, LPAR1, MAP1B, MAPT, NCKAP1, NEXN, PARP3, PHLDB1, PLEKHG2, PLXNB1, RAC2, SMC1A, SORBS3, SPICE1, SPIRE1, TTBK2, WIPF2, XPO1]
GO:0070507	regulation of microtubule cytoskeleton organization	GO_BiologicalProcess-EBI-UniProt-GOA-ACAP-ARAP_16.06.2020_00h00	0.00448575	0.0491071	5.57812e-08	6.27538e-07	[4, 5, 6, 7]	Group40	13.1783	17	[CAMSAP2, CCP110, CEP250, CKAP5, CLASP1, CLASP2, CLIP1, HNRNPU, KIF11, MAP1B, MAPT, PARP3, PHLDB1, SMC1A, SPICE1, TTBK2, XPO1]
GO:0018130	heterocycle biosynthetic process	GO_BiologicalProcess-EBI-UniProt-GOA-ACAP-ARAP_16.06.2020_00h00	0.00322862	0.0407001	0.00450201	0.00494123	[4]	Group41	7.75081	214	[ABLIM3, ACVR1, ADCY6, ADSS, AFMID, AGAP2, ALDH18A1, ANHX, APBB2, ARNT2, ARNTL, ASXL1, ATF1, ATP2B4, BCL9, BRCA1, BRCA2, BRWD3, CAPN3, CARD8, CARF, CD36, CDK12, CDK13, CDON, CDYL, CHEK2, CHUK, CIITA, CMKLR1, CPEB3, CREM, CTCF, CTDP1, CUX1, DAXX, DCAF1, DDR2, DDX58, DGUOK, DNMT3A, DPF1, DPF2, ELF2, ELL3, EMSY, EPC1, EPC2, FAM172A, FBXW11, FGFR4, FOSL2, FOXJ3, FOXN3, FPGS, GABPB1, GPHN, GTF2E1, GTF…
GO:0019438	aromatic compound biosynthetic process	GO_BiologicalProcess-EBI-UniProt-GOA-ACAP-ARAP_16.06.2020_00h00	0.00357965	0.0434783	0.00450201	0.00494123	[4]	Group41	7.73401	214	[ABLIM3, ACVR1, ADCY6, ADSS, AFMID, AGAP2, ANHX, APBB2, ARNT2, ARNTL, ASXL1, ATF1, ATP2B4, BCL9, BRCA1, BRCA2, BRWD3, CAPN3, CARD8, CARF, CD36, CDH3, CDK12, CDK13, CDON, CDYL, CHEK2, CHUK, CIITA, CMKLR1, CPEB3, CREM, CTCF, CTDP1, CUX1, DAXX, DCAF1, DDR2, DDX58, DGUOK, DNMT3A, DPF1, DPF2, ELF2, ELL3, EMSY, EPC1, EPC2, FAM172A, FBXW11, FGFR4, FOSL2, FOXJ3, FOXN3, FPGS, GABPB1, GTF2E1, GTF2I, GTF2IR…
GO:1901362	organic cyclic compound biosynthetic process	GO_BiologicalProcess-EBI-UniProt-GOA-ACAP-ARAP_16.06.2020_00h00	0.00450201	0.0486451	0.00450201	0.00494123	[4]	Group41	7.68147	218	[ABLIM3, ACVR1, ADCY6, ADSS, AFMID, AGAP2, ALDH18A1, ANHX, APBB2, ARNT2, ARNTL, ASXL1, ATF1, ATP2B4, BCL9, BRCA1, BRCA2, BRWD3, CACNA1H, CAPN3, CARD8, CARF, CD36, CDH3, CDK12, CDK13, CDON, CDYL, CHEK2, CHUK, CIITA, CMKLR1, CPEB3, CREM, CTCF, CTDP1, CUX1, DAXX, DCAF1, DDR2, DDX58, DGUOK, DNMT3A, DPF1, DPF2, ELF2, ELL3, EMSY, EPC1, EPC2, FAM172A, FBXW11, FGFR4, FOSL2, FOXJ3, FOXN3, FPGS, GABPB1, GP…
GO:0034654	nucleobase-containing compound biosynthetic process	GO_BiologicalProcess-EBI-UniProt-GOA-ACAP-ARAP_16.06.2020_00h00	0.004821	0.0495194	0.00450201	0.00494123	[4, 5]	Group41	7.70365	209	[ABLIM3, ACVR1, ADCY6, ADSS, AFMID, AGAP2, ANHX, APBB2, ARNT2, ARNTL, ASXL1, ATF1, ATP2B4, BCL9, BRCA1, BRCA2, BRWD3, CAPN3, CARD8, CARF, CD36, CDK12, CDK13, CDON, CDYL, CHEK2, CHUK, CIITA, CMKLR1, CPEB3, CREM, CTCF, CTDP1, CUX1, DAXX, DCAF1, DDR2, DDX58, DGUOK, DNMT3A, DPF1, DPF2, ELF2, ELL3, EMSY, EPC1, EPC2, FAM172A, FBXW11, FGFR4, FOSL2, FOXJ3, FOXN3, GABPB1, GTF2E1, GTF2I, GTF2IRD1, GUCY2C, …
GO:2001141	regulation of RNA biosynthetic process	GO_BiologicalProcess-EBI-UniProt-GOA-ACAP-ARAP_16.06.2020_00h00	0.00449113	0.0488448	0.00450201	0.00494123	[5, 6, 7, 8]	Group41	7.8272	183	[ABLIM3, ACVR1, AGAP2, ANHX, APBB2, ARNT2, ARNTL, ASXL1, ATF1, ATP2B4, BCL9, BRCA1, BRCA2, BRWD3, CAPN3, CARD8, CARF, CD36, CDK12, CDK13, CDON, CDYL, CHEK2, CHUK, CIITA, CMKLR1, CPEB3, CREM, CTCF, CTDP1, CUX1, DAXX, DCAF1, DDR2, DDX58, DNMT3A, DPF1, DPF2, ELF2, ELL3, EMSY, EPC1, EPC2, FAM172A, FBXW11, FOSL2, FOXJ3, FOXN3, GABPB1, GTF2E1, GTF2IRD1, HLF, HMBOX1, HNF1B, HNRNPK, HNRNPU, HSF4, IGF2, I…
GO:1903506	regulation of nucleic acid-templated transcription	GO_BiologicalProcess-EBI-UniProt-GOA-ACAP-ARAP_16.06.2020_00h00	0.00441128	0.0492642	0.00450201	0.00494123	[6, 7, 8, 9]	Group41	7.83055	183	[ABLIM3, ACVR1, AGAP2, ANHX, APBB2, ARNT2, ARNTL, ASXL1, ATF1, ATP2B4, BCL9, BRCA1, BRCA2, BRWD3, CAPN3, CARD8, CARF, CD36, CDK12, CDK13, CDON, CDYL, CHEK2, CHUK, CIITA, CMKLR1, CPEB3, CREM, CTCF, CTDP1, CUX1, DAXX, DCAF1, DDR2, DDX58, DNMT3A, DPF1, DPF2, ELF2, ELL3, EMSY, EPC1, EPC2, FAM172A, FBXW11, FOSL2, FOXJ3, FOXN3, GABPB1, GTF2E1, GTF2IRD1, HLF, HMBOX1, HNF1B, HNRNPK, HNRNPU, HSF4, IGF2, I…
GO:0008092	cytoskeletal protein binding	GO_MolecularFunction-EBI-UniProt-GOA-ACAP-ARAP_16.06.2020_00h00	1.87927e-07	5.21185e-05	2.18518e-11	3.27778e-10	[3]	Group42	11.6809	82	[ABLIM3, ANLN, ARHGEF10, BIN1, BRCA2, CACNB2, CAMSAP2, CAPN3, CCDC66, CENPE, CKAP5, CLASP1, CLASP2, CLIP1, CLIP2, DLG5, EML4, EML5, EPB41, EPB41L2, EPS8, EPS8L1, EPS8L2, EVL, FARP2, FERMT2, FGD4, FMNL2, HOOK2, HOOK3, HSPH1, JAKMIP3, KCNMA1, KCNQ2, KIF11, KIF16B, KIF1A, KIF1B, KIF27, KIF9, KIFC3, KLHL2, LDB3, LIMCH1, LOC101081807, LRRC49, MAP1B, MAP2, MAPK8IP3, MAPT, MICAL3, MYO10, MYO1D, MYO5B, M…
GO:0003779	actin binding	GO_MolecularFunction-EBI-UniProt-GOA-ACAP-ARAP_16.06.2020_00h00	5.34052e-05	0.00233859	2.18518e-11	3.27778e-10	[4]	Group42	12.7036	39	[ABLIM3, ANLN, BIN1, CACNB2, EPB41, EPB41L2, EPS8, EPS8L1, EPS8L2, EVL, FERMT2, FMNL2, KCNMA1, KLHL2, LDB3, LIMCH1, MAP1B, MICAL3, MYO10, MYO1D, MYO5B, MYO5C, MYO9A, MYO9B, NEBL, NEXN, PHACTR1, PKNOX2, PLS3, PTK2, PXK, RAI14, SPIRE1, SVIL, TMEM201, TPM2, TPM3, VILL, WIPF2]
GO:0097435	supramolecular fiber organization	GO_BiologicalProcess-EBI-UniProt-GOA-ACAP-ARAP_16.06.2020_00h00	0.000907482	0.0179768	2.18518e-11	3.27778e-10	[4]	Group42	10.2823	51	[ABI2, AGFG1, ARHGEF10, BIN1, CAMSAP2, CAPN3, CCDC155, CD36, CDC42EP4, CKAP5, CLIP1, CLIP2, DDR2, EPS8, EVL, F11R, FHOD1, GHSR, HOOK2, HOOK3, KANK1, KIAA1211, LDB3, LIMCH1, LOXL3, LPAR1, MAP1B, MAPT, MDM2, MICAL3, MYO1D, MYO5B, MYO5C, NCKAP1, NEBL, PCM1, PHACTR1, PLEKHG2, PLS3, RAC2, SERPINH1, SH3KBP1, SORBS2, SORBS3, SPIRE1, SRC, TPM2, TPM3, TTBK2, TUBGCP5, WIPF2]
GO:0030036	actin cytoskeleton organization	GO_BiologicalProcess-EBI-UniProt-GOA-ACAP-ARAP_16.06.2020_00h00	0.0011185	0.0200128	2.18518e-11	3.27778e-10	[3, 6]	Group42	10.1365	52	[ABI2, ABLIM3, AMOTL2, ANLN, ARFGEF3, ARHGAP26, ARHGEF10, BIN1, BRSK2, CAPN3, CCDC155, CDC42BPG, CDC42EP4, CIT, EHBP1, EPB41, EPB41L2, EPS8, EVL, F11R, FARP2, FHOD1, FMNL2, GHSR, ITGB3, KANK1, KIAA1211, LDB3, LIMCH1, LOC101086801, LPAR1, MICAL3, MKLN1, MYO1D, MYO5B, MYO5C, NCKAP1, NEBL, PALLD, PHACTR1, PLEKHG2, PLS3, RAC2, SH3KBP1, SORBS2, SORBS3, SPIRE1, SRC, STARD8, TPM2, TPM3, WIPF2]
GO:0007010	cytoskeleton organization	GO_BiologicalProcess-EBI-UniProt-GOA-ACAP-ARAP_16.06.2020_00h00	4.24911e-09	1.76763e-06	2.18518e-11	3.27778e-10	[5]	Group42	11.334	113	[ABI2, ABLIM3, AFAP1, AGFG1, AMOTL2, ANLN, ARFGEF3, ARHGAP26, ARHGEF10, AURKB, BIN1, BRCA1, BRCA2, BRSK2, BRWD3, CAMSAP2, CAPN3, CC2D2A, CCDC120, CCDC155, CCDC66, CCP110, CDC14B, CDC42BPG, CDC42EP4, CENPE, CEP250, CHEK2, CIT, CKAP5, CLASP1, CLASP2, CLIP1, CLIP2, CNTROB, CSNK1A1, EHBP1, EML4, EPB41, EPB41L2, EPS8, EVL, F11R, FARP2, FGD4, FHOD1, FMNL2, GHSR, HAUS3, HAUS5, HNRNPU, HOOK2, HOOK3, HYDI…
GO:0015629	actin cytoskeleton	GO_CellularComponent-EBI-UniProt-GOA-ACAP-ARAP_16.06.2020_00h00	0.000761195	0.0162388	2.18518e-11	3.27778e-10	[5, 6]	Group42	11.1748	39	[ABLIM3, ACACA, AFAP1, ANLN, CDC42EP4, CIT, CTTNBP2NL, DCTN3, DCTN4, DDR2, DDX58, EHBP1, FERMT2, FGR, KIF9, KLHL2, LDB3, LIMCH1, MICAL3, MYLK, MYO10, MYO1D, MYO5B, MYO5C, MYO9A, MYO9B, NEBL, NEXN, PALLD, PKNOX2, PLS3, PTK2, SH3PXD2A, SRC, TMEM63B, TPM2, TPM3, WHRN, WIPF2]
GO:0016772	transferase activity, transferring phosphorus-containing groups	GO_MolecularFunction-EBI-UniProt-GOA-ACAP-ARAP_16.06.2020_00h00	0.000259573	0.00830635	5.4509e-07	2.72545e-06	[3]	Group43	9.04645	111	[AAK1, ACVR1, ADARB1, ALDH18A1, ALPK1, ATP2B4, AURKB, BMX, BRSK2, CAMK2G, CAMKK2, CAMKV, CCNY, CDC42BPG, CDK12, CDK13, CDK19, CENPE, CHEK2, CHKA, CHUK, CIT, CRLS1, CSNK1A1, DAXX, DBF4, DCAF1, DDR2, DGUOK, DOK7, DUSP8, DYRK3, EPHB1, EPHB4, ETAA1, FGF13, FGFR4, FGGY, FGR, GK5, GNAQ, GPHN, GUCY2C, HIPK1, HIPK3, HMBOX1, HNRNPD, HYKK, ICK, IGF2, IL18, IPMK, IRAK4, ITGB3, LOC101091160, LPAR1, LYN, MAK,…
GO:0044093	positive regulation of molecular function	GO_BiologicalProcess-EBI-UniProt-GOA-ACAP-ARAP_16.06.2020_00h00	1.44844e-05	0.00100425	5.4509e-07	2.72545e-06	[3]	Group43	9.7028	111	[AGAP2, AGFG1, AKAP6, APH1B, ARHGAP26, ARHGAP9, ARHGEF10, ATP1B2, ATP2B4, CAPN3, CARD8, CASP8, CCNY, CD36, CDCA5, CDH3, CENPE, CHM, CHUK, DAXX, DBF4, DCUN1D2, DCUN1D3, DCUN1D4, DDR2, DDX58, DOK7, DYNC1I2, EIF4G1, ELMOD2, EPB41, EPHB1, EPHB4, ETAA1, F11R, FGF13, FGFR4, FGR, FN1, GIT2, GNAQ, HMBOX1, HNRNPD, IDE, IGF2, IKBKG, IL18, KRIT1, LOC101086801, LOC101091160, LOC101093602, LPAR1, LYN, MAP3K1,…
GO:0016773	phosphotransferase activity, alcohol group as acceptor	GO_MolecularFunction-EBI-UniProt-GOA-ACAP-ARAP_16.06.2020_00h00	0.0016881	0.0260093	5.4509e-07	2.72545e-06	[4]	Group43	8.89328	90	[AAK1, ACVR1, ADARB1, ALPK1, ATP2B4, AURKB, BMX, BRSK2, CAMK2G, CAMKK2, CAMKV, CCNY, CDC42BPG, CDK12, CDK13, CDK19, CENPE, CHEK2, CHKA, CHUK, CIT, CSNK1A1, DAXX, DBF4, DCAF1, DDR2, DOK7, DUSP8, DYRK3, EPHB1, EPHB4, ETAA1, FGF13, FGFR4, FGGY, FGR, GK5, GNAQ, GUCY2C, HIPK1, HIPK3, ICK, IGF2, IL18, IPMK, IRAK4, ITGB3, LOC101091160, LPAR1, LYN, MAK, MAP3K1, MAP3K11, MAPK6, MAPK8IP3, MAST2, MAST3, MOK…
GO:0043085	positive regulation of catalytic activity	GO_BiologicalProcess-EBI-UniProt-GOA-ACAP-ARAP_16.06.2020_00h00	0.000227892	0.00743554	5.4509e-07	2.72545e-06	[4]	Group43	9.53947	87	[AGAP2, AGFG1, APH1B, ARHGAP26, ARHGAP9, ARHGEF10, ATP1B2, ATP2B4, CARD8, CASP8, CCNY, CDH3, CENPE, CHM, DAXX, DBF4, DCUN1D2, DCUN1D3, DCUN1D4, DDR2, DOK7, DYNC1I2, ELMOD2, EPHB1, EPHB4, ETAA1, F11R, FGF13, FGFR4, FGR, FN1, GIT2, GNAQ, HMBOX1, HNRNPD, IGF2, IL18, LOC101086801, LOC101091160, LOC101093602, LPAR1, LYN, MAP3K1, MAP3K11, MAPK8IP3, MYO9A, MYO9B, NCAPG2, NEK10, NEK4, NPRL3, OCRL, OSBPL2…
GO:0051347	positive regulation of transferase activity	GO_BiologicalProcess-EBI-UniProt-GOA-ACAP-ARAP_16.06.2020_00h00	0.000848021	0.0172086	5.4509e-07	2.72545e-06	[5]	Group43	10.6635	45	[ATP2B4, CCNY, CENPE, DAXX, DBF4, DCUN1D2, DCUN1D3, DCUN1D4, DDR2, DOK7, EPHB1, EPHB4, ETAA1, FGF13, FGFR4, FGR, HMBOX1, HNRNPD, IGF2, IL18, LOC101091160, LPAR1, LYN, MAP3K1, MAP3K11, MAPK8IP3, NCAPG2, NEK10, NEK4, P2RX7, PDGFB, PDPK1, PTK2, RAF1, RAPGEF2, RPTOR, SH3GLB1, SPAG9, SRC, STK24, STRADA, TIRAP, TOM1L1, VAV2, XRCC6]
GO:0016301	kinase activity	GO_BiologicalProcess-EBI-UniProt-GOA-ACAP-ARAP_16.06.2020_00h00	0.000493072	0.0124314	5.4509e-07	2.72545e-06	[6]	Group43	9.08257	99	[AAK1, ACVR1, ADARB1, ALDH18A1, ALPK1, ATP2B4, AURKB, BMX, BRSK2, CAMK2G, CAMKK2, CAMKV, CCNY, CDC42BPG, CDK12, CDK13, CDK19, CENPE, CHEK2, CHKA, CHUK, CIT, CSNK1A1, DAXX, DBF4, DCAF1, DDR2, DGUOK, DOK7, DUSP8, DYRK3, EPHB1, EPHB4, ETAA1, FGF13, FGFR4, FGGY, FGR, GK5, GNAQ, GUCY2C, HIPK1, HIPK3, HYKK, ICK, IGF2, IL18, IPMK, IRAK4, ITGB3, LOC101091160, LPAR1, LYN, MAK, MAP3K1, MAP3K11, MAPK6, MAPK…
GO:0004672	protein kinase activity	GO_BiologicalProcess-EBI-UniProt-GOA-ACAP-ARAP_16.06.2020_00h00	0.00198672	0.0292557	5.4509e-07	2.72545e-06	[7, 8]	Group43	8.99123	82	[AAK1, ACVR1, ADARB1, ALPK1, ATP2B4, AURKB, BMX, BRSK2, CAMK2G, CAMKK2, CAMKV, CCNY, CDC42BPG, CDK12, CDK13, CDK19, CENPE, CHEK2, CHUK, CIT, CSNK1A1, DAXX, DBF4, DCAF1, DDR2, DOK7, DUSP8, DYRK3, EPHB1, EPHB4, ETAA1, FGF13, FGFR4, FGR, GNAQ, GUCY2C, HIPK1, HIPK3, ICK, IGF2, IL18, IRAK4, ITGB3, LOC101091160, LPAR1, LYN, MAK, MAP3K1, MAP3K11, MAPK6, MAPK8IP3, MAST2, MAST3, MOK, MYLK, NCAPG2, NEK10, …
GO:0033674	positive regulation of kinase activity	GO_BiologicalProcess-EBI-UniProt-GOA-ACAP-ARAP_16.06.2020_00h00	0.00112071	0.019839	5.4509e-07	2.72545e-06	[6, 7, 8, 9]	Group43	10.8696	40	[ATP2B4, CCNY, CENPE, DAXX, DBF4, DDR2, DOK7, EPHB1, EPHB4, ETAA1, FGF13, FGFR4, FGR, IGF2, IL18, LOC101091160, LPAR1, LYN, MAP3K1, MAP3K11, MAPK8IP3, NCAPG2, NEK10, NEK4, P2RX7, PDGFB, PDPK1, PTK2, RAF1, RAPGEF2, RPTOR, SH3GLB1, SPAG9, SRC, STK24, STRADA, TIRAP, TOM1L1, VAV2, XRCC6]
GO:0008092	cytoskeletal protein binding	GO_MolecularFunction-EBI-UniProt-GOA-ACAP-ARAP_16.06.2020_00h00	1.87927e-07	5.21185e-05	2.17689e-07	1.39943e-06	[3]	Group44	11.6809	82	[ABLIM3, ANLN, ARHGEF10, BIN1, BRCA2, CACNB2, CAMSAP2, CAPN3, CCDC66, CENPE, CKAP5, CLASP1, CLASP2, CLIP1, CLIP2, DLG5, EML4, EML5, EPB41, EPB41L2, EPS8, EPS8L1, EPS8L2, EVL, FARP2, FERMT2, FGD4, FMNL2, HOOK2, HOOK3, HSPH1, JAKMIP3, KCNMA1, KCNQ2, KIF11, KIF16B, KIF1A, KIF1B, KIF27, KIF9, KIFC3, KLHL2, LDB3, LIMCH1, LOC101081807, LRRC49, MAP1B, MAP2, MAPK8IP3, MAPT, MICAL3, MYO10, MYO1D, MYO5B, M…
GO:0006996	organelle organization	GO_BiologicalProcess-EBI-UniProt-GOA-ACAP-ARAP_16.06.2020_00h00	1.53888e-05	0.00102428	2.17689e-07	1.39943e-06	[4]	Group44	8.45714	222	[ABCD3, ABI2, ABLIM3, ACP2, AFAP1, AFF2, AGFG1, AMOTL2, ANLN, ARFGEF3, ARHGAP26, ARHGEF10, ARMC9, ASXL1, ATL1, ATL2, AURKB, BIN1, BRCA1, BRCA2, BRSK2, BRWD3, C2CD5, CAMSAP2, CAPN3, CAV2, CB3H14orf39, CC2D2A, CCDC120, CCDC155, CCDC66, CCP110, CDC14B, CDC42BPG, CDC42EP4, CDCA5, CDKN3, CENPE, CENPP, CEP250, CHEK2, CIT, CKAP5, CLASP1, CLASP2, CLIP1, CLIP2, CNTROB, COG2, CSNK1A1, CTCF, CTDP1, CUL4B, D…
GO:0022607	cellular component assembly	GO_BiologicalProcess-EBI-UniProt-GOA-ACAP-ARAP_16.06.2020_00h00	0.00110719	0.0200258	2.17689e-07	1.39943e-06	[4]	Group44	8.29215	151	[ABLIM3, ACACA, ADGRB2, AGFG1, ALDH1A2, ANLN, APBA1, ARHGEF10, ARMC9, ATL1, ATL2, BIN1, CAMSAP2, CAPN3, CAV2, CC2D2A, CCDC155, CCDC66, CCP110, CD36, CDC14B, CDC42EP4, CDKN3, CELF2, CENPE, CENPP, CEP250, CHEK2, CKAP5, CLASP1, CLASP2, CLIP1, CNTROB, CTCF, DAXX, DHX30, DLG4, DLG5, DMC1, DNMT3A, DYNC2H1, DZIP1, EIF3K, EIF4G1, EPHB1, EPS8, EPS8L1, EPS8L2, EVL, F11R, FAM172A, FARP2, FERMT2, FGD4, FHOD1…
GO:0097435	supramolecular fiber organization	GO_BiologicalProcess-EBI-UniProt-GOA-ACAP-ARAP_16.06.2020_00h00	0.000907482	0.0179768	2.17689e-07	1.39943e-06	[4]	Group44	10.2823	51	[ABI2, AGFG1, ARHGEF10, BIN1, CAMSAP2, CAPN3, CCDC155, CD36, CDC42EP4, CKAP5, CLIP1, CLIP2, DDR2, EPS8, EVL, F11R, FHOD1, GHSR, HOOK2, HOOK3, KANK1, KIAA1211, LDB3, LIMCH1, LOXL3, LPAR1, MAP1B, MAPT, MDM2, MICAL3, MYO1D, MYO5B, MYO5C, NCKAP1, NEBL, PCM1, PHACTR1, PLEKHG2, PLS3, RAC2, SERPINH1, SH3KBP1, SORBS2, SORBS3, SPIRE1, SRC, TPM2, TPM3, TTBK2, TUBGCP5, WIPF2]
GO:0000226	microtubule cytoskeleton organization	GO_BiologicalProcess-EBI-UniProt-GOA-ACAP-ARAP_16.06.2020_00h00	2.70317e-05	0.00140565	2.17689e-07	1.39943e-06	[3, 6]	Group44	11.8605	51	[ARHGEF10, AURKB, BRCA1, BRCA2, BRSK2, CAMSAP2, CC2D2A, CCDC120, CCDC155, CCDC66, CCP110, CDC14B, CENPE, CEP250, CHEK2, CKAP5, CLASP1, CLASP2, CLIP1, CLIP2, CNTROB, EML4, HAUS3, HAUS5, HNRNPU, HOOK2, HOOK3, HYDIN, KIF11, KIZ, LOC101081807, LOC101101403, LRRC49, MAP1B, MAP2, MAPT, NCOR1, OBSL1, PARP3, PCM1, PHLDB1, PTK2, SMC1A, SPICE1, SPIRE1, TACC1, TTBK2, TTC26, TUBGCP5, XPO1, ZNF207]
GO:0005856	cytoskeleton	GO_CellularComponent-EBI-UniProt-GOA-ACAP-ARAP_16.06.2020_00h00	7.61566e-10	1.26725e-06	2.17689e-07	1.39943e-06	[4, 5]	Group44	10.7647	145	[ABLIM3, ACACA, ADGRB2, AFAP1, ANLN, ARHGEF10, ARMC9, AURKB, BFSP1, BIN1, BRCA2, BRSK2, C2CD5, CAMSAP2, CCDC120, CCDC141, CCDC155, CCDC66, CCP110, CDC14B, CDC42BPG, CDC42EP4, CENPE, CEP112, CEP250, CEP85L, CIT, CKAP5, CLASP1, CLASP2, CLIP1, CLIP2, CNTROB, CSNK1A1, CTDP1, CTTNBP2NL, DCTN3, DCTN4, DDR2, DDX58, DLG4, DLG5, DNHD1, DPF2, DYNC1I2, DYNC2H1, DYRK3, DZIP1, EHBP1, EML4, EPB41, EPB41L2, EVL…
GO:0030036	actin cytoskeleton organization	GO_BiologicalProcess-EBI-UniProt-GOA-ACAP-ARAP_16.06.2020_00h00	0.0011185	0.0200128	2.17689e-07	1.39943e-06	[3, 6]	Group44	10.1365	52	[ABI2, ABLIM3, AMOTL2, ANLN, ARFGEF3, ARHGAP26, ARHGEF10, BIN1, BRSK2, CAPN3, CCDC155, CDC42BPG, CDC42EP4, CIT, EHBP1, EPB41, EPB41L2, EPS8, EVL, F11R, FARP2, FHOD1, FMNL2, GHSR, ITGB3, KANK1, KIAA1211, LDB3, LIMCH1, LOC101086801, LPAR1, MICAL3, MKLN1, MYO1D, MYO5B, MYO5C, NCKAP1, NEBL, PALLD, PHACTR1, PLEKHG2, PLS3, RAC2, SH3KBP1, SORBS2, SORBS3, SPIRE1, SRC, STARD8, TPM2, TPM3, WIPF2]
GO:0007010	cytoskeleton organization	GO_BiologicalProcess-EBI-UniProt-GOA-ACAP-ARAP_16.06.2020_00h00	4.24911e-09	1.76763e-06	2.17689e-07	1.39943e-06	[5]	Group44	11.334	113	[ABI2, ABLIM3, AFAP1, AGFG1, AMOTL2, ANLN, ARFGEF3, ARHGAP26, ARHGEF10, AURKB, BIN1, BRCA1, BRCA2, BRSK2, BRWD3, CAMSAP2, CAPN3, CC2D2A, CCDC120, CCDC155, CCDC66, CCP110, CDC14B, CDC42BPG, CDC42EP4, CENPE, CEP250, CHEK2, CIT, CKAP5, CLASP1, CLASP2, CLIP1, CLIP2, CNTROB, CSNK1A1, EHBP1, EML4, EPB41, EPB41L2, EPS8, EVL, F11R, FARP2, FGD4, FHOD1, FMNL2, GHSR, HAUS3, HAUS5, HNRNPU, HOOK2, HOOK3, HYDI…
GO:0051493	regulation of cytoskeleton organization	GO_BiologicalProcess-EBI-UniProt-GOA-ACAP-ARAP_16.06.2020_00h00	0.00452536	0.0485819	2.17689e-07	1.39943e-06	[5, 6]	Group44	10.1877	38	[AFAP1, ARHGEF10, BIN1, CAMSAP2, CCP110, CDC42EP4, CEP250, CKAP5, CLASP1, CLASP2, CLIP1, EPS8, EVL, F11R, FHOD1, HNRNPU, ITGB3, KANK1, KIAA1211, KIF11, LIMCH1, LPAR1, MAP1B, MAPT, NCKAP1, NEXN, PARP3, PHLDB1, PLEKHG2, PLXNB1, RAC2, SMC1A, SORBS3, SPICE1, SPIRE1, TTBK2, WIPF2, XPO1]
GO:0008092	cytoskeletal protein binding	GO_MolecularFunction-EBI-UniProt-GOA-ACAP-ARAP_16.06.2020_00h00	1.87927e-07	5.21185e-05	1.4396e-06	5.88926e-06	[3]	Group45	11.6809	82	[ABLIM3, ANLN, ARHGEF10, BIN1, BRCA2, CACNB2, CAMSAP2, CAPN3, CCDC66, CENPE, CKAP5, CLASP1, CLASP2, CLIP1, CLIP2, DLG5, EML4, EML5, EPB41, EPB41L2, EPS8, EPS8L1, EPS8L2, EVL, FARP2, FERMT2, FGD4, FMNL2, HOOK2, HOOK3, HSPH1, JAKMIP3, KCNMA1, KCNQ2, KIF11, KIF16B, KIF1A, KIF1B, KIF27, KIF9, KIFC3, KLHL2, LDB3, LIMCH1, LOC101081807, LRRC49, MAP1B, MAP2, MAPK8IP3, MAPT, MICAL3, MYO10, MYO1D, MYO5B, M…
GO:0043228	non-membrane-bounded organelle	GO_CellularComponent-EBI-UniProt-GOA-ACAP-ARAP_16.06.2020_00h00	0.000215956	0.00718702	1.4396e-06	5.88926e-06	[3]	Group45	8.09935	225	[ABLIM3, ACACA, ADARB1, ADGRB2, AFAP1, ANLN, ARHGEF10, ARMC9, ARNTL, ATP2B4, AURKB, BFSP1, BIN1, BMS1, BRCA1, BRCA2, BRSK2, C2CD5, CAMSAP2, CARF, CB3H14orf39, CCDC120, CCDC141, CCDC155, CCDC66, CCP110, CD2H10orf71, CDC14B, CDC42BPG, CDC42EP4, CDCA2, CDCA5, CDK12, CDYL, CENPE, CENPP, CEP112, CEP250, CEP85L, CHEK2, CIT, CKAP5, CLASP1, CLASP2, CLIP1, CLIP2, CNTROB, CSNK1A1, CTCF, CTDP1, CTTNBP2NL, D…
GO:0043232	intracellular non-membrane-bounded organelle	GO_CellularComponent-EBI-UniProt-GOA-ACAP-ARAP_16.06.2020_00h00	0.000206793	0.00702253	1.4396e-06	5.88926e-06	[3, 4]	Group45	8.10519	225	[ABLIM3, ACACA, ADARB1, ADGRB2, AFAP1, ANLN, ARHGEF10, ARMC9, ARNTL, ATP2B4, AURKB, BFSP1, BIN1, BMS1, BRCA1, BRCA2, BRSK2, C2CD5, CAMSAP2, CARF, CB3H14orf39, CCDC120, CCDC141, CCDC155, CCDC66, CCP110, CD2H10orf71, CDC14B, CDC42BPG, CDC42EP4, CDCA2, CDCA5, CDK12, CDYL, CENPE, CENPP, CEP112, CEP250, CEP85L, CHEK2, CIT, CKAP5, CLASP1, CLASP2, CLIP1, CLIP2, CNTROB, CSNK1A1, CTCF, CTDP1, CTTNBP2NL, D…
GO:0000226	microtubule cytoskeleton organization	GO_BiologicalProcess-EBI-UniProt-GOA-ACAP-ARAP_16.06.2020_00h00	2.70317e-05	0.00140565	1.4396e-06	5.88926e-06	[3, 6]	Group45	11.8605	51	[ARHGEF10, AURKB, BRCA1, BRCA2, BRSK2, CAMSAP2, CC2D2A, CCDC120, CCDC155, CCDC66, CCP110, CDC14B, CENPE, CEP250, CHEK2, CKAP5, CLASP1, CLASP2, CLIP1, CLIP2, CNTROB, EML4, HAUS3, HAUS5, HNRNPU, HOOK2, HOOK3, HYDIN, KIF11, KIZ, LOC101081807, LOC101101403, LRRC49, MAP1B, MAP2, MAPT, NCOR1, OBSL1, PARP3, PCM1, PHLDB1, PTK2, SMC1A, SPICE1, SPIRE1, TACC1, TTBK2, TTC26, TUBGCP5, XPO1, ZNF207]
GO:0005856	cytoskeleton	GO_CellularComponent-EBI-UniProt-GOA-ACAP-ARAP_16.06.2020_00h00	7.61566e-10	1.26725e-06	1.4396e-06	5.88926e-06	[4, 5]	Group45	10.7647	145	[ABLIM3, ACACA, ADGRB2, AFAP1, ANLN, ARHGEF10, ARMC9, AURKB, BFSP1, BIN1, BRCA2, BRSK2, C2CD5, CAMSAP2, CCDC120, CCDC141, CCDC155, CCDC66, CCP110, CDC14B, CDC42BPG, CDC42EP4, CENPE, CEP112, CEP250, CEP85L, CIT, CKAP5, CLASP1, CLASP2, CLIP1, CLIP2, CNTROB, CSNK1A1, CTDP1, CTTNBP2NL, DCTN3, DCTN4, DDR2, DDX58, DLG4, DLG5, DNHD1, DPF2, DYNC1I2, DYNC2H1, DYRK3, DZIP1, EHBP1, EML4, EPB41, EPB41L2, EVL…
GO:0005815	microtubule organizing center	GO_CellularComponent-EBI-UniProt-GOA-ACAP-ARAP_16.06.2020_00h00	4.22491e-09	2.34342e-06	1.4396e-06	5.88926e-06	[2, 6, 7]	Group45	13.7374	68	[ADGRB2, ARHGEF10, ARMC9, AURKB, BRCA2, BRSK2, C2CD5, CAMSAP2, CCDC120, CCDC141, CCDC66, CCP110, CDC14B, CDC42BPG, CEP112, CEP250, CEP85L, CKAP5, CLASP1, CLASP2, CLIP1, CNTROB, CSNK1A1, CTDP1, DCTN4, DLG5, DPF2, DYNC1I2, DYRK3, DZIP1, EHBP1, FBXW11, HAUS3, HAUS5, HIPK1, HMBOX1, HNRNPU, HOOK2, HOOK3, ICK, IFT140, IQCB1, ITGB6, ITSN2, JADE1, KIZ, LOC101093537, MAK, MAP3K11, NME7, OBSL1, PCM1, PDE4D…
GO:0007010	cytoskeleton organization	GO_BiologicalProcess-EBI-UniProt-GOA-ACAP-ARAP_16.06.2020_00h00	4.24911e-09	1.76763e-06	1.4396e-06	5.88926e-06	[5]	Group45	11.334	113	[ABI2, ABLIM3, AFAP1, AGFG1, AMOTL2, ANLN, ARFGEF3, ARHGAP26, ARHGEF10, AURKB, BIN1, BRCA1, BRCA2, BRSK2, BRWD3, CAMSAP2, CAPN3, CC2D2A, CCDC120, CCDC155, CCDC66, CCP110, CDC14B, CDC42BPG, CDC42EP4, CENPE, CEP250, CHEK2, CIT, CKAP5, CLASP1, CLASP2, CLIP1, CLIP2, CNTROB, CSNK1A1, EHBP1, EML4, EPB41, EPB41L2, EPS8, EVL, F11R, FARP2, FGD4, FHOD1, FMNL2, GHSR, HAUS3, HAUS5, HNRNPU, HOOK2, HOOK3, HYDI…
GO:0015630	microtubule cytoskeleton	GO_CellularComponent-EBI-UniProt-GOA-ACAP-ARAP_16.06.2020_00h00	1.67618e-09	1.39458e-06	1.4396e-06	5.88926e-06	[5, 6]	Group45	12.1554	97	[ADGRB2, ARHGEF10, ARMC9, AURKB, BRCA2, BRSK2, C2CD5, CAMSAP2, CCDC120, CCDC141, CCDC155, CCDC66, CCP110, CDC14B, CDC42BPG, CDC42EP4, CENPE, CEP112, CEP250, CEP85L, CKAP5, CLASP1, CLASP2, CLIP1, CLIP2, CNTROB, CSNK1A1, CTDP1, DCTN3, DCTN4, DLG5, DNHD1, DPF2, DYNC1I2, DYNC2H1, DYRK3, DZIP1, EHBP1, EML4, EPB41, FBXW11, HAUS3, HAUS5, HIPK1, HMBOX1, HNRNPU, HOOK2, HOOK3, HSPH1, ICK, IFT140, IKBKG, IQ…
GO:0005813	centrosome	GO_CellularComponent-EBI-UniProt-GOA-ACAP-ARAP_16.06.2020_00h00	5.76486e-08	1.91855e-05	1.4396e-06	5.88926e-06	[3, 7, 8]	Group45	13.9651	56	[ADGRB2, ARHGEF10, AURKB, BRCA2, BRSK2, C2CD5, CAMSAP2, CCDC141, CCDC66, CCP110, CDC14B, CDC42BPG, CEP112, CEP250, CEP85L, CKAP5, CLIP1, CNTROB, CSNK1A1, CTDP1, DCTN4, DPF2, DYNC1I2, DYRK3, FBXW11, HAUS3, HAUS5, HIPK1, HMBOX1, HNRNPU, HOOK2, HOOK3, IFT140, IQCB1, ITGB6, ITSN2, KIZ, MAK, MAP3K11, NME7, OBSL1, PCM1, PDE4D, PLAG1, PRKACB, PXK, RAD18, RAP1GAP2, SFI1, SPAG9, SPICE1, TBC1D31, TSEN2, TT…
GO:0008092	cytoskeletal protein binding	GO_MolecularFunction-EBI-UniProt-GOA-ACAP-ARAP_16.06.2020_00h00	1.87927e-07	5.21185e-05	7.80838e-13	3.51377e-11	[3]	Group46	11.6809	82	[ABLIM3, ANLN, ARHGEF10, BIN1, BRCA2, CACNB2, CAMSAP2, CAPN3, CCDC66, CENPE, CKAP5, CLASP1, CLASP2, CLIP1, CLIP2, DLG5, EML4, EML5, EPB41, EPB41L2, EPS8, EPS8L1, EPS8L2, EVL, FARP2, FERMT2, FGD4, FMNL2, HOOK2, HOOK3, HSPH1, JAKMIP3, KCNMA1, KCNQ2, KIF11, KIF16B, KIF1A, KIF1B, KIF27, KIF9, KIFC3, KLHL2, LDB3, LIMCH1, LOC101081807, LRRC49, MAP1B, MAP2, MAPK8IP3, MAPT, MICAL3, MYO10, MYO1D, MYO5B, M…
GO:0003779	actin binding	GO_MolecularFunction-EBI-UniProt-GOA-ACAP-ARAP_16.06.2020_00h00	5.34052e-05	0.00233859	7.80838e-13	3.51377e-11	[4]	Group46	12.7036	39	[ABLIM3, ANLN, BIN1, CACNB2, EPB41, EPB41L2, EPS8, EPS8L1, EPS8L2, EVL, FERMT2, FMNL2, KCNMA1, KLHL2, LDB3, LIMCH1, MAP1B, MICAL3, MYO10, MYO1D, MYO5B, MYO5C, MYO9A, MYO9B, NEBL, NEXN, PHACTR1, PKNOX2, PLS3, PTK2, PXK, RAI14, SPIRE1, SVIL, TMEM201, TPM2, TPM3, VILL, WIPF2]
GO:0015631	tubulin binding	GO_MolecularFunction-EBI-UniProt-GOA-ACAP-ARAP_16.06.2020_00h00	0.000303926	0.00936543	7.80838e-13	3.51377e-11	[4]	Group46	12.406	33	[BRCA2, CAMSAP2, CCDC66, CENPE, CKAP5, CLASP1, CLASP2, CLIP1, CLIP2, EML4, EML5, FGD4, HOOK2, HOOK3, HSPH1, JAKMIP3, KIF11, KIF16B, KIF1A, KIF1B, KIF27, KIF9, KIFC3, LOC101081807, LRRC49, MAP1B, MAP2, MAPT, REEP1, TRAF3IP1, TTBK2, TUBGCP5, ZNF207]
GO:0000226	microtubule cytoskeleton organization	GO_BiologicalProcess-EBI-UniProt-GOA-ACAP-ARAP_16.06.2020_00h00	2.70317e-05	0.00140565	7.80838e-13	3.51377e-11	[3, 6]	Group46	11.8605	51	[ARHGEF10, AURKB, BRCA1, BRCA2, BRSK2, CAMSAP2, CC2D2A, CCDC120, CCDC155, CCDC66, CCP110, CDC14B, CENPE, CEP250, CHEK2, CKAP5, CLASP1, CLASP2, CLIP1, CLIP2, CNTROB, EML4, HAUS3, HAUS5, HNRNPU, HOOK2, HOOK3, HYDIN, KIF11, KIZ, LOC101081807, LOC101101403, LRRC49, MAP1B, MAP2, MAPT, NCOR1, OBSL1, PARP3, PCM1, PHLDB1, PTK2, SMC1A, SPICE1, SPIRE1, TACC1, TTBK2, TTC26, TUBGCP5, XPO1, ZNF207]
GO:0005856	cytoskeleton	GO_CellularComponent-EBI-UniProt-GOA-ACAP-ARAP_16.06.2020_00h00	7.61566e-10	1.26725e-06	7.80838e-13	3.51377e-11	[4, 5]	Group46	10.7647	145	[ABLIM3, ACACA, ADGRB2, AFAP1, ANLN, ARHGEF10, ARMC9, AURKB, BFSP1, BIN1, BRCA2, BRSK2, C2CD5, CAMSAP2, CCDC120, CCDC141, CCDC155, CCDC66, CCP110, CDC14B, CDC42BPG, CDC42EP4, CENPE, CEP112, CEP250, CEP85L, CIT, CKAP5, CLASP1, CLASP2, CLIP1, CLIP2, CNTROB, CSNK1A1, CTDP1, CTTNBP2NL, DCTN3, DCTN4, DDR2, DDX58, DLG4, DLG5, DNHD1, DPF2, DYNC1I2, DYNC2H1, DYRK3, DZIP1, EHBP1, EML4, EPB41, EPB41L2, EVL…
GO:0007010	cytoskeleton organization	GO_BiologicalProcess-EBI-UniProt-GOA-ACAP-ARAP_16.06.2020_00h00	4.24911e-09	1.76763e-06	7.80838e-13	3.51377e-11	[5]	Group46	11.334	113	[ABI2, ABLIM3, AFAP1, AGFG1, AMOTL2, ANLN, ARFGEF3, ARHGAP26, ARHGEF10, AURKB, BIN1, BRCA1, BRCA2, BRSK2, BRWD3, CAMSAP2, CAPN3, CC2D2A, CCDC120, CCDC155, CCDC66, CCP110, CDC14B, CDC42BPG, CDC42EP4, CENPE, CEP250, CHEK2, CIT, CKAP5, CLASP1, CLASP2, CLIP1, CLIP2, CNTROB, CSNK1A1, EHBP1, EML4, EPB41, EPB41L2, EPS8, EVL, F11R, FARP2, FGD4, FHOD1, FMNL2, GHSR, HAUS3, HAUS5, HNRNPU, HOOK2, HOOK3, HYDI…
GO:0008017	microtubule binding	GO_MolecularFunction-EBI-UniProt-GOA-ACAP-ARAP_16.06.2020_00h00	2.08756e-05	0.00119783	7.80838e-13	3.51377e-11	[5]	Group46	15.1042	29	[CAMSAP2, CCDC66, CENPE, CKAP5, CLASP1, CLASP2, CLIP1, CLIP2, EML4, EML5, FGD4, HOOK2, HOOK3, JAKMIP3, KIF11, KIF16B, KIF1A, KIF1B, KIF27, KIF9, KIFC3, MAP1B, MAP2, MAPT, REEP1, TRAF3IP1, TTBK2, TUBGCP5, ZNF207]
GO:0070507	regulation of microtubule cytoskeleton organization	GO_BiologicalProcess-EBI-UniProt-GOA-ACAP-ARAP_16.06.2020_00h00	0.00448575	0.0491071	7.80838e-13	3.51377e-11	[4, 5, 6, 7]	Group46	13.1783	17	[CAMSAP2, CCP110, CEP250, CKAP5, CLASP1, CLASP2, CLIP1, HNRNPU, KIF11, MAP1B, MAPT, PARP3, PHLDB1, SMC1A, SPICE1, TTBK2, XPO1]
GO:0099513	polymeric cytoskeletal fiber	GO_CellularComponent-EBI-UniProt-GOA-ACAP-ARAP_16.06.2020_00h00	0.00184345	0.0276352	7.80838e-13	3.51377e-11	[5, 6]	Group46	10.7345	38	[AURKB, BFSP1, CAMSAP2, CCDC66, CENPE, CKAP5, CLASP1, CLASP2, CLIP1, CLIP2, CSNK1A1, DYNC1I2, DYNC2H1, EHBP1, HNRNPU, HSPH1, KIF11, KIF16B, KIF1A, KIF27, KIF9, KIFC3, LDB3, MAP1B, MAP2, MAP3K11, MAPT, MYO9B, PALLD, PLS3, RADIL, REEP1, SRC, TPM2, TPM3, TUBGCP5, WHRN, WIPF2]
GO:0005874	microtubule	GO_CellularComponent-EBI-UniProt-GOA-ACAP-ARAP_16.06.2020_00h00	0.00113627	0.0199026	7.80838e-13	3.51377e-11	[6, 7]	Group46	12.5	26	[AURKB, CAMSAP2, CCDC66, CENPE, CKAP5, CLASP1, CLASP2, CLIP1, CLIP2, DYNC1I2, DYNC2H1, HNRNPU, HSPH1, KIF11, KIF16B, KIF1A, KIF27, KIF9, KIFC3, MAP1B, MAP2, MAP3K11, MAPT, RADIL, REEP1, TUBGCP5]
GO:0019899	enzyme binding	GO_MolecularFunction-EBI-UniProt-GOA-ACAP-ARAP_16.06.2020_00h00	3.09697e-06	0.000515335	1.11394e-06	5.01273e-06	[3]	Group47	9.48218	141	[ACVR1, ADCY6, ANLN, ANXA9, ARFGEF3, ARHGEF10, ARHGEF11, ARHGEF3, ATP2B4, BIN1, BRCA1, BRCA2, BRSK2, CAV2, CCNY, CCPG1, CDC42EP4, CDK12, CDK13, CEP250, CHEK2, CHM, CTTNBP2NL, CUL4B, DAXX, DCUN1D2, DCUN1D3, DCUN1D4, DDX58, DENND1B, DENND4C, DLG4, DOCK10, DOCK9, DOK7, EPS8, EPS8L1, EPS8L2, EXPH5, FARP2, FGD4, FGR, FMNL2, FN1, GAB2, GLMN, HNRNPU, IKBKG, IQCB1, ITGB3, ITSN2, JAKMIP3, KCNQ1, KDM4C, KI…
GO:0005085	guanyl-nucleotide exchange factor activity	GO_BiologicalProcess-EBI-UniProt-GOA-ACAP-ARAP_16.06.2020_00h00	1.8402e-05	0.00109361	1.11394e-06	5.01273e-06	[4]	Group47	15.4696	28	[ARFGEF3, ARHGEF10, ARHGEF11, ARHGEF3, CCPG1, DENND1B, DENND4C, DOCK10, DOCK9, EPS8, EPS8L1, EPS8L2, FARP2, FGD4, ITSN2, MCF2L, PLEKHG2, PLEKHG5, RALGPS2, RAPGEF2, RAPGEF4, RAPGEF6, SBF1, SBF2, SH2D3C, SPATA13, TIAM1, VAV2]
GO:0051020	GTPase binding	GO_MolecularFunction-EBI-UniProt-GOA-ACAP-ARAP_16.06.2020_00h00	9.54869e-06	0.000794451	1.11394e-06	5.01273e-06	[4]	Group47	12.3188	51	[ANLN, ANXA9, ARFGEF3, ARHGEF10, ARHGEF11, ARHGEF3, CCPG1, CDC42EP4, CHM, DENND1B, DENND4C, DOCK10, DOCK9, EPS8, EPS8L1, EPS8L2, EXPH5, FARP2, FGD4, FMNL2, ITSN2, MCF2L, MICAL3, MYO9B, NCKAP1, NPC1L1, OCRL, PLEKHG2, PLEKHG5, RABGAP1, RAD9A, RAF1, RALGPS2, RANBP3L, RAPGEF2, RAPGEF4, RAPGEF6, RNF152, RNF41, RRAGB, SBF1, SBF2, SH2D3C, SH3BP4, SPATA13, SYTL4, TBC1D5, TBC1D8, TIAM1, VAV2, XPO1]
GO:0005088	Ras guanyl-nucleotide exchange factor activity	GO_BiologicalProcess-EBI-UniProt-GOA-ACAP-ARAP_16.06.2020_00h00	9.23647e-06	0.000853861	1.11394e-06	5.01273e-06	[5]	Group47	20.9302	18	[ARHGEF10, ARHGEF11, ARHGEF3, CCPG1, DENND1B, DENND4C, EPS8, EPS8L1, EPS8L2, FARP2, FGD4, PLEKHG2, PLEKHG5, RAPGEF2, RAPGEF4, SBF1, SBF2, TIAM1]
GO:0007264	small GTPase mediated signal transduction	GO_BiologicalProcess-EBI-UniProt-GOA-ACAP-ARAP_16.06.2020_00h00	0.000804174	0.0165203	1.11394e-06	5.01273e-06	[4, 5, 6]	Group47	11.1429	39	[ARFGEF3, ARHGAP26, ARHGEF10, ARHGEF11, ARHGEF3, CDC42EP4, CDON, CHM, DOCK10, DOCK9, EPS8, EPS8L1, EPS8L2, F11R, FARP2, KANK2, LOC101086801, LPAR1, MYO9B, NCKAP1, PDPN, RAB2A, RAB7B, RAC2, RALGPS2, RAP1GAP2, RAPGEF2, RAPGEF4, RAPGEF6, RASA2, RHOBTB1, RRAS2, SH2D3C, SIPA1L2, SRC, STARD8, SYNGAP1, TIAM1, VAV2]
GO:0031267	small GTPase binding	GO_MolecularFunction-EBI-UniProt-GOA-ACAP-ARAP_16.06.2020_00h00	2.22613e-05	0.00119493	1.11394e-06	5.01273e-06	[5]	Group47	13.0719	40	[ANLN, ANXA9, ARHGEF10, ARHGEF11, ARHGEF3, CCPG1, CDC42EP4, CHM, DENND1B, DENND4C, EPS8, EPS8L1, EPS8L2, EXPH5, FARP2, FGD4, FMNL2, MICAL3, MYO9B, NCKAP1, NPC1L1, OCRL, PLEKHG2, PLEKHG5, RABGAP1, RAD9A, RAF1, RANBP3L, RAPGEF2, RAPGEF4, RNF152, RNF41, SBF1, SBF2, SH3BP4, SYTL4, TBC1D5, TBC1D8, TIAM1, XPO1]
GO:0005089	Rho guanyl-nucleotide exchange factor activity	GO_BiologicalProcess-EBI-UniProt-GOA-ACAP-ARAP_16.06.2020_00h00	1.74375e-05	0.00107467	1.11394e-06	5.01273e-06	[6]	Group47	27.2727	12	[ARHGEF10, ARHGEF11, ARHGEF3, CCPG1, EPS8, EPS8L1, EPS8L2, FARP2, FGD4, PLEKHG2, PLEKHG5, TIAM1]
GO:0017016	Ras GTPase binding	GO_MolecularFunction-EBI-UniProt-GOA-ACAP-ARAP_16.06.2020_00h00	2.16826e-05	0.00120266	1.11394e-06	5.01273e-06	[6]	Group47	13.2203	39	[ANLN, ANXA9, ARHGEF10, ARHGEF11, ARHGEF3, CCPG1, CDC42EP4, CHM, DENND1B, DENND4C, EPS8, EPS8L1, EPS8L2, EXPH5, FARP2, FGD4, FMNL2, MICAL3, MYO9B, NCKAP1, NPC1L1, OCRL, PLEKHG2, PLEKHG5, RABGAP1, RAD9A, RAF1, RANBP3L, RAPGEF2, RAPGEF4, RNF41, SBF1, SBF2, SH3BP4, SYTL4, TBC1D5, TBC1D8, TIAM1, XPO1]
GO:0051056	regulation of small GTPase mediated signal transduction	GO_BiologicalProcess-EBI-UniProt-GOA-ACAP-ARAP_16.06.2020_00h00	0.00220415	0.0313479	1.11394e-06	5.01273e-06	[5, 6, 7]	Group47	13.1579	20	[ARFGEF3, ARHGAP26, ARHGEF10, ARHGEF3, CDON, EPS8, EPS8L1, EPS8L2, F11R, KANK2, LOC101086801, LPAR1, MYO9B, RALGPS2, RAP1GAP2, RASA2, SIPA1L2, SRC, STARD8, SYNGAP1]
GO:0007266	Rho protein signal transduction	GO_BiologicalProcess-EBI-UniProt-GOA-ACAP-ARAP_16.06.2020_00h00	0.00207214	0.029983	1.11394e-06	5.01273e-06	[6, 7, 8]	Group47	15.5556	14	[ARHGEF10, ARHGEF11, ARHGEF3, CDC42EP4, EPS8, EPS8L1, EPS8L2, F11R, KANK2, LOC101086801, LPAR1, MYO9B, PDPN, STARD8]
GO:0017048	Rho GTPase binding	GO_MolecularFunction-EBI-UniProt-GOA-ACAP-ARAP_16.06.2020_00h00	0.000382452	0.0107864	1.11394e-06	5.01273e-06	[7]	Group47	15.9292	18	[ANLN, ARHGEF10, ARHGEF11, ARHGEF3, CCPG1, CDC42EP4, EPS8, EPS8L1, EPS8L2, FARP2, FGD4, FMNL2, MYO9B, NCKAP1, OCRL, PLEKHG2, PLEKHG5, TIAM1]
GO:0030676	Rac guanyl-nucleotide exchange factor activity	GO_BiologicalProcess-EBI-UniProt-GOA-ACAP-ARAP_16.06.2020_00h00	0.00145325	0.0228133	1.11394e-06	5.01273e-06	[7]	Group47	35.7143	5	[EPS8, EPS8L1, EPS8L2, FARP2, TIAM1]
GO:0035023	regulation of Rho protein signal transduction	GO_BiologicalProcess-EBI-UniProt-GOA-ACAP-ARAP_16.06.2020_00h00	0.00119498	0.0202902	1.11394e-06	5.01273e-06	[7, 8, 9]	Group47	18.9655	11	[ARHGEF10, ARHGEF3, EPS8, EPS8L1, EPS8L2, F11R, KANK2, LOC101086801, LPAR1, MYO9B, STARD8]
GO:0016817	hydrolase activity, acting on acid anhydrides	GO_MolecularFunction-EBI-UniProt-GOA-ACAP-ARAP_16.06.2020_00h00	0.000605265	0.0141854	5.16662e-07	2.90623e-06	[3]	Group48	9.13556	93	[ABCC2, ABCC5, ABCD3, ABCG4, AGAP2, AGFG1, ARHGAP26, ARHGAP9, ARHGEF10, ATL1, ATL2, ATP1B2, BMS1, BNIPL, CARNS1, CENPE, CHM, DHX30, DHX32, DMC1, DNHD1, DYNC1I2, DYNC2H1, ELMOD2, F11R, FGD4, GIT2, GNAL, GNAQ, GTPBP1, HSPH1, KIF11, KIF16B, KIF1A, KIF1B, KIF27, KIF9, KIFC3, LOC101083959, LOC101086801, LOC101091160, LOC101093602, LRRC49, MMAA, MSH5, MYO10, MYO1D, MYO5B, MYO5C, MYO9A, MYO9B, NPC1L1, N…
GO:0044093	positive regulation of molecular function	GO_BiologicalProcess-EBI-UniProt-GOA-ACAP-ARAP_16.06.2020_00h00	1.44844e-05	0.00100425	5.16662e-07	2.90623e-06	[3]	Group48	9.7028	111	[AGAP2, AGFG1, AKAP6, APH1B, ARHGAP26, ARHGAP9, ARHGEF10, ATP1B2, ATP2B4, CAPN3, CARD8, CASP8, CCNY, CD36, CDCA5, CDH3, CENPE, CHM, CHUK, DAXX, DBF4, DCUN1D2, DCUN1D3, DCUN1D4, DDR2, DDX58, DOK7, DYNC1I2, EIF4G1, ELMOD2, EPB41, EPHB1, EPHB4, ETAA1, F11R, FGF13, FGFR4, FGR, FN1, GIT2, GNAQ, HMBOX1, HNRNPD, IDE, IGF2, IKBKG, IL18, KRIT1, LOC101086801, LOC101091160, LOC101093602, LPAR1, LYN, MAP3K1,…
GO:0016818	hydrolase activity, acting on acid anhydrides, in phosphorus-containing anhydrides	GO_MolecularFunction-EBI-UniProt-GOA-ACAP-ARAP_16.06.2020_00h00	0.000567578	0.0136877	5.16662e-07	2.90623e-06	[4]	Group48	9.15354	93	[ABCC2, ABCC5, ABCD3, ABCG4, AGAP2, AGFG1, ARHGAP26, ARHGAP9, ARHGEF10, ATL1, ATL2, ATP1B2, BMS1, BNIPL, CARNS1, CENPE, CHM, DHX30, DHX32, DMC1, DNHD1, DYNC1I2, DYNC2H1, ELMOD2, F11R, FGD4, GIT2, GNAL, GNAQ, GTPBP1, HSPH1, KIF11, KIF16B, KIF1A, KIF1B, KIF27, KIF9, KIFC3, LOC101083959, LOC101086801, LOC101091160, LOC101093602, LRRC49, MMAA, MSH5, MYO10, MYO1D, MYO5B, MYO5C, MYO9A, MYO9B, NPC1L1, N…
GO:0043085	positive regulation of catalytic activity	GO_BiologicalProcess-EBI-UniProt-GOA-ACAP-ARAP_16.06.2020_00h00	0.000227892	0.00743554	5.16662e-07	2.90623e-06	[4]	Group48	9.53947	87	[AGAP2, AGFG1, APH1B, ARHGAP26, ARHGAP9, ARHGEF10, ATP1B2, ATP2B4, CARD8, CASP8, CCNY, CDH3, CENPE, CHM, DAXX, DBF4, DCUN1D2, DCUN1D3, DCUN1D4, DDR2, DOK7, DYNC1I2, ELMOD2, EPHB1, EPHB4, ETAA1, F11R, FGF13, FGFR4, FGR, FN1, GIT2, GNAQ, HMBOX1, HNRNPD, IGF2, IL18, LOC101086801, LOC101091160, LOC101093602, LPAR1, LYN, MAP3K1, MAP3K11, MAPK8IP3, MYO9A, MYO9B, NCAPG2, NEK10, NEK4, NPRL3, OCRL, OSBPL2…
GO:0008047	enzyme activator activity	GO_BiologicalProcess-EBI-UniProt-GOA-ACAP-ARAP_16.06.2020_00h00	4.3867e-05	0.00197283	5.16662e-07	2.90623e-06	[5]	Group48	12.4629	42	[AGAP2, AGFG1, ARHGAP26, ARHGAP9, ATP1B2, CARD8, CHM, DAXX, DBF4, ELMOD2, ETAA1, FGF13, FN1, GIT2, GNAQ, IGF2, LOC101086801, LOC101091160, LOC101093602, MYO9A, MYO9B, NPRL3, OCRL, OSBPL2, PDGFB, PDPK1, RABGAP1, RAD9A, RANBP3L, RAP1GAP2, RAPGEF2, RASA2, RASAL2, RPTOR, SH3PXD2A, SIPA1L2, STARD8, STRADA, SYNGAP1, TBC1D5, TBC1D8, TOM1L1]
GO:0016462	pyrophosphatase activity	GO_MolecularFunction-EBI-UniProt-GOA-ACAP-ARAP_16.06.2020_00h00	0.000498499	0.0121986	5.16662e-07	2.90623e-06	[5]	Group48	9.18972	93	[ABCC2, ABCC5, ABCD3, ABCG4, AGAP2, AGFG1, ARHGAP26, ARHGAP9, ARHGEF10, ATL1, ATL2, ATP1B2, BMS1, BNIPL, CARNS1, CENPE, CHM, DHX30, DHX32, DMC1, DNHD1, DYNC1I2, DYNC2H1, ELMOD2, F11R, FGD4, GIT2, GNAL, GNAQ, GTPBP1, HSPH1, KIF11, KIF16B, KIF1A, KIF1B, KIF27, KIF9, KIFC3, LOC101083959, LOC101086801, LOC101091160, LOC101093602, LRRC49, MMAA, MSH5, MYO10, MYO1D, MYO5B, MYO5C, MYO9A, MYO9B, NPC1L1, N…
GO:0043087	regulation of GTPase activity	GO_BiologicalProcess-EBI-UniProt-GOA-ACAP-ARAP_16.06.2020_00h00	0.000965897	0.0182642	5.16662e-07	2.90623e-06	[5]	Group48	11.2121	37	[AGAP2, AGFG1, ARHGAP26, ARHGAP9, ARHGEF10, CHM, ELMOD2, F11R, GIT2, GNAQ, LOC101086801, LOC101091160, LOC101093602, MYO9A, MYO9B, NPRL3, OCRL, PLXNA2, PLXNB1, PLXNB3, RABGAP1, RAD9A, RANBP3L, RAP1GAP2, RAPGEF2, RASA2, RASAL2, SBF1, SBF2, SEMA4D, SIPA1L2, STARD8, SYNGAP1, TBC1D5, TBC1D8, TIAM1, VAV2]
GO:0051347	positive regulation of transferase activity	GO_BiologicalProcess-EBI-UniProt-GOA-ACAP-ARAP_16.06.2020_00h00	0.000848021	0.0172086	5.16662e-07	2.90623e-06	[5]	Group48	10.6635	45	[ATP2B4, CCNY, CENPE, DAXX, DBF4, DCUN1D2, DCUN1D3, DCUN1D4, DDR2, DOK7, EPHB1, EPHB4, ETAA1, FGF13, FGFR4, FGR, HMBOX1, HNRNPD, IGF2, IL18, LOC101091160, LPAR1, LYN, MAP3K1, MAP3K11, MAPK8IP3, NCAPG2, NEK10, NEK4, P2RX7, PDGFB, PDPK1, PTK2, RAF1, RAPGEF2, RPTOR, SH3GLB1, SPAG9, SRC, STK24, STRADA, TIRAP, TOM1L1, VAV2, XRCC6]
GO:0060589	nucleoside-triphosphatase regulator activity	GO_BiologicalProcess-EBI-UniProt-GOA-ACAP-ARAP_16.06.2020_00h00	0.000456114	0.0116765	5.16662e-07	2.90623e-06	[5]	Group48	12.7193	29	[AGAP2, AGFG1, ARHGAP26, ARHGAP9, ATP1B2, CHM, ELMOD2, GIT2, GNAQ, HSPH1, LOC101086801, LOC101091160, LOC101093602, MYO9A, MYO9B, NPRL3, OCRL, RABGAP1, RAD9A, RANBP3L, RAP1GAP2, RAPGEF2, RASA2, RASAL2, SIPA1L2, STARD8, SYNGAP1, TBC1D5, TBC1D8]
GO:0017111	nucleoside-triphosphatase activity	GO_MolecularFunction-EBI-UniProt-GOA-ACAP-ARAP_16.06.2020_00h00	0.00152384	0.0236979	5.16662e-07	2.90623e-06	[6]	Group48	8.97833	87	[ABCC2, ABCC5, ABCD3, ABCG4, AGAP2, AGFG1, ARHGAP26, ARHGAP9, ARHGEF10, ATL1, ATL2, ATP1B2, BMS1, CARNS1, CENPE, CHM, DHX30, DHX32, DMC1, DNHD1, DYNC1I2, DYNC2H1, ELMOD2, F11R, FGD4, GIT2, GNAL, GNAQ, GTPBP1, HSPH1, KIF11, KIF16B, KIF1A, KIF1B, KIF27, KIF9, KIFC3, LOC101083959, LOC101086801, LOC101091160, LOC101093602, LRRC49, MMAA, MSH5, MYO10, MYO1D, MYO5B, MYO5C, MYO9A, MYO9B, NPC1L1, NPRL3, N…
GO:0030695	GTPase regulator activity	GO_BiologicalProcess-EBI-UniProt-GOA-ACAP-ARAP_16.06.2020_00h00	0.000407224	0.0109294	5.16662e-07	2.90623e-06	[6]	Group48	13.1707	27	[AGAP2, AGFG1, ARHGAP26, ARHGAP9, CHM, ELMOD2, GIT2, GNAQ, LOC101086801, LOC101091160, LOC101093602, MYO9A, MYO9B, NPRL3, OCRL, RABGAP1, RAD9A, RANBP3L, RAP1GAP2, RAPGEF2, RASA2, RASAL2, SIPA1L2, STARD8, SYNGAP1, TBC1D5, TBC1D8]
GO:0043547	positive regulation of GTPase activity	GO_BiologicalProcess-EBI-UniProt-GOA-ACAP-ARAP_16.06.2020_00h00	0.00105849	0.0195703	5.16662e-07	2.90623e-06	[6]	Group48	11.6788	32	[AGAP2, AGFG1, ARHGAP26, ARHGAP9, ARHGEF10, CHM, ELMOD2, F11R, GIT2, GNAQ, LOC101086801, LOC101091160, LOC101093602, MYO9A, MYO9B, NPRL3, OCRL, PLXNB1, RABGAP1, RAD9A, RANBP3L, RAP1GAP2, RAPGEF2, RASA2, RASAL2, SEMA4D, SIPA1L2, STARD8, SYNGAP1, TBC1D5, TBC1D8, TIAM1]
GO:0005096	GTPase activator activity	GO_BiologicalProcess-EBI-UniProt-GOA-ACAP-ARAP_16.06.2020_00h00	9.64842e-05	0.00391584	5.16662e-07	2.90623e-06	[6, 7]	Group48	14.3617	27	[AGAP2, AGFG1, ARHGAP26, ARHGAP9, CHM, ELMOD2, GIT2, GNAQ, LOC101086801, LOC101091160, LOC101093602, MYO9A, MYO9B, NPRL3, OCRL, RABGAP1, RAD9A, RANBP3L, RAP1GAP2, RAPGEF2, RASA2, RASAL2, SIPA1L2, STARD8, SYNGAP1, TBC1D5, TBC1D8]
GO:0004672	protein kinase activity	GO_BiologicalProcess-EBI-UniProt-GOA-ACAP-ARAP_16.06.2020_00h00	0.00198672	0.0292557	5.16662e-07	2.90623e-06	[7, 8]	Group48	8.99123	82	[AAK1, ACVR1, ADARB1, ALPK1, ATP2B4, AURKB, BMX, BRSK2, CAMK2G, CAMKK2, CAMKV, CCNY, CDC42BPG, CDK12, CDK13, CDK19, CENPE, CHEK2, CHUK, CIT, CSNK1A1, DAXX, DBF4, DCAF1, DDR2, DOK7, DUSP8, DYRK3, EPHB1, EPHB4, ETAA1, FGF13, FGFR4, FGR, GNAQ, GUCY2C, HIPK1, HIPK3, ICK, IGF2, IL18, IRAK4, ITGB3, LOC101091160, LPAR1, LYN, MAK, MAP3K1, MAP3K11, MAPK6, MAPK8IP3, MAST2, MAST3, MOK, MYLK, NCAPG2, NEK10, …
GO:0033674	positive regulation of kinase activity	GO_BiologicalProcess-EBI-UniProt-GOA-ACAP-ARAP_16.06.2020_00h00	0.00112071	0.019839	5.16662e-07	2.90623e-06	[6, 7, 8, 9]	Group48	10.8696	40	[ATP2B4, CCNY, CENPE, DAXX, DBF4, DDR2, DOK7, EPHB1, EPHB4, ETAA1, FGF13, FGFR4, FGR, IGF2, IL18, LOC101091160, LPAR1, LYN, MAP3K1, MAP3K11, MAPK8IP3, NCAPG2, NEK10, NEK4, P2RX7, PDGFB, PDPK1, PTK2, RAF1, RAPGEF2, RPTOR, SH3GLB1, SPAG9, SRC, STK24, STRADA, TIRAP, TOM1L1, VAV2, XRCC6]
GO:0006793	phosphorus metabolic process	GO_BiologicalProcess-EBI-UniProt-GOA-ACAP-ARAP_16.06.2020_00h00	0.00033776	0.00986021	1.22473e-07	1.10225e-06	[3]	Group49	8.242	188	[AAK1, ACACA, ACP2, ACVR1, ADARB1, ADCY6, ADSS, AFMID, ALDH18A1, ALPK1, ARFGEF3, ARR3, ATP2B4, AURKB, BMX, BNIPL, BRAT1, BRSK2, CAMK2G, CAMKK2, CAMKV, CASP6, CAV2, CCNY, CD36, CDC14B, CDC42BPG, CDCA2, CDK12, CDK13, CDK19, CDKN3, CDON, CENPE, CHEK2, CHKA, CHUK, CIT, CRLS1, CSNK1A1, CTDP1, CTDSPL, CTTNBP2NL, DAXX, DBF4, DCAF1, DDR2, DGUOK, DOK7, DUSP8, DYRK3, EIF4G1, EPHB1, EPHB4, ETAA1, FAM126B, F…
GO:0016772	transferase activity, transferring phosphorus-containing groups	GO_MolecularFunction-EBI-UniProt-GOA-ACAP-ARAP_16.06.2020_00h00	0.000259573	0.00830635	1.22473e-07	1.10225e-06	[3]	Group49	9.04645	111	[AAK1, ACVR1, ADARB1, ALDH18A1, ALPK1, ATP2B4, AURKB, BMX, BRSK2, CAMK2G, CAMKK2, CAMKV, CCNY, CDC42BPG, CDK12, CDK13, CDK19, CENPE, CHEK2, CHKA, CHUK, CIT, CRLS1, CSNK1A1, DAXX, DBF4, DCAF1, DDR2, DGUOK, DOK7, DUSP8, DYRK3, EPHB1, EPHB4, ETAA1, FGF13, FGFR4, FGGY, FGR, GK5, GNAQ, GPHN, GUCY2C, HIPK1, HIPK3, HMBOX1, HNRNPD, HYKK, ICK, IGF2, IL18, IPMK, IRAK4, ITGB3, LOC101091160, LPAR1, LYN, MAK,…
GO:0043168	anion binding	GO_MolecularFunction-EBI-UniProt-GOA-ACAP-ARAP_16.06.2020_00h00	3.45691e-06	0.000522936	1.22473e-07	1.10225e-06	[3]	Group49	8.87656	192	[AAK1, ABCC2, ABCC5, ABCD3, ABCG4, ACACA, ACBD4, ACVR1, ADCY6, ADSS, AGAP2, ALB, ALDH18A1, ALPK1, ANXA9, ARHGAP26, ATL1, ATL2, ATP11B, ATP11C, ATP1A4, ATP2B4, ATP7B, ATP9A, AURKB, BIN1, BMS1, BMX, BRSK2, C2CD5, CAMK2G, CAMKK2, CAMKV, CARNS1, CCPG1, CDC42BPG, CDK12, CDK13, CDK19, CENPE, CHDH, CHEK2, CHM, CHUK, CIITA, CIT, CSNK1A1, DDR2, DDX58, DENND1B, DGUOK, DHX30, DHX32, DMC1, DNHD1, DYNC2H1, DY…
GO:1901265	nucleoside phosphate binding	GO_MolecularFunction-EBI-UniProt-GOA-ACAP-ARAP_16.06.2020_00h00	1.33581e-05	0.00101036	1.22473e-07	1.10225e-06	[3]	Group49	9.04845	155	[AAK1, ABCC2, ABCC5, ABCD3, ABCG4, ACACA, ACBD4, ACVR1, ADCY6, ADSS, AGAP2, ALDH18A1, ALPK1, ATL1, ATL2, ATP11B, ATP11C, ATP1A4, ATP2B4, ATP7B, ATP9A, AURKB, BMS1, BMX, BRSK2, CAMK2G, CAMKK2, CAMKV, CARNS1, CCPG1, CDC42BPG, CDK12, CDK13, CDK19, CENPE, CHDH, CHEK2, CHM, CHUK, CIITA, CIT, CSNK1A1, DDR2, DDX58, DGUOK, DHX30, DHX32, DMC1, DNHD1, DYNC2H1, DYRK3, EIF4G1, EPHB1, EPHB4, FGD4, FGFR4, FGR,…
GO:0000166	nucleotide binding	GO_MolecularFunction-EBI-UniProt-GOA-ACAP-ARAP_16.06.2020_00h00	1.33581e-05	0.00101036	1.22473e-07	1.10225e-06	[3, 4]	Group49	9.04845	155	[AAK1, ABCC2, ABCC5, ABCD3, ABCG4, ACACA, ACBD4, ACVR1, ADCY6, ADSS, AGAP2, ALDH18A1, ALPK1, ATL1, ATL2, ATP11B, ATP11C, ATP1A4, ATP2B4, ATP7B, ATP9A, AURKB, BMS1, BMX, BRSK2, CAMK2G, CAMKK2, CAMKV, CARNS1, CCPG1, CDC42BPG, CDK12, CDK13, CDK19, CENPE, CHDH, CHEK2, CHM, CHUK, CIITA, CIT, CSNK1A1, DDR2, DDX58, DGUOK, DHX30, DHX32, DMC1, DNHD1, DYNC2H1, DYRK3, EIF4G1, EPHB1, EPHB4, FGD4, FGFR4, FGR,…
GO:0006796	phosphate-containing compound metabolic process	GO_BiologicalProcess-EBI-UniProt-GOA-ACAP-ARAP_16.06.2020_00h00	0.000412298	0.0107197	1.22473e-07	1.10225e-06	[4]	Group49	8.22281	186	[AAK1, ACACA, ACP2, ACVR1, ADARB1, ADCY6, ADSS, AFMID, ALDH18A1, ALPK1, ARFGEF3, ARR3, ATP2B4, AURKB, BMX, BRAT1, BRSK2, CAMK2G, CAMKK2, CAMKV, CASP6, CAV2, CCNY, CD36, CDC14B, CDC42BPG, CDCA2, CDK12, CDK13, CDK19, CDKN3, CDON, CENPE, CHEK2, CHKA, CHUK, CIT, CRLS1, CSNK1A1, CTDP1, CTDSPL, CTTNBP2NL, DAXX, DBF4, DCAF1, DDR2, DGUOK, DOK7, DUSP8, DYRK3, EIF4G1, EPHB1, EPHB4, ETAA1, FAM126B, FBXW11, …
GO:0016773	phosphotransferase activity, alcohol group as acceptor	GO_MolecularFunction-EBI-UniProt-GOA-ACAP-ARAP_16.06.2020_00h00	0.0016881	0.0260093	1.22473e-07	1.10225e-06	[4]	Group49	8.89328	90	[AAK1, ACVR1, ADARB1, ALPK1, ATP2B4, AURKB, BMX, BRSK2, CAMK2G, CAMKK2, CAMKV, CCNY, CDC42BPG, CDK12, CDK13, CDK19, CENPE, CHEK2, CHKA, CHUK, CIT, CSNK1A1, DAXX, DBF4, DCAF1, DDR2, DOK7, DUSP8, DYRK3, EPHB1, EPHB4, ETAA1, FGF13, FGFR4, FGGY, FGR, GK5, GNAQ, GUCY2C, HIPK1, HIPK3, ICK, IGF2, IL18, IPMK, IRAK4, ITGB3, LOC101091160, LPAR1, LYN, MAK, MAP3K1, MAP3K11, MAPK6, MAPK8IP3, MAST2, MAST3, MOK…
GO:0032553	ribonucleotide binding	GO_MolecularFunction-EBI-UniProt-GOA-ACAP-ARAP_16.06.2020_00h00	1.02386e-05	0.000811286	1.22473e-07	1.10225e-06	[3, 4, 5]	Group49	9.2437	143	[AAK1, ABCC2, ABCC5, ABCD3, ABCG4, ACACA, ACBD4, ACVR1, ADCY6, ADSS, AGAP2, ALDH18A1, ALPK1, ATL1, ATL2, ATP11B, ATP11C, ATP1A4, ATP2B4, ATP7B, ATP9A, AURKB, BMS1, BMX, BRSK2, CAMK2G, CAMKK2, CAMKV, CARNS1, CCPG1, CDC42BPG, CDK12, CDK13, CDK19, CENPE, CHEK2, CHM, CHUK, CIITA, CIT, CSNK1A1, DDR2, DDX58, DGUOK, DHX30, DHX32, DMC1, DNHD1, DYNC2H1, DYRK3, EIF4G1, EPHB1, EPHB4, FGD4, FGFR4, FGR, FPGS,…
GO:0035639	purine ribonucleoside triphosphate binding	GO_MolecularFunction-EBI-UniProt-GOA-ACAP-ARAP_16.06.2020_00h00	9.30131e-06	0.000814599	1.22473e-07	1.10225e-06	[4]	Group49	9.33063	138	[AAK1, ABCC2, ABCC5, ABCD3, ABCG4, ACACA, ACVR1, ADCY6, ADSS, AGAP2, ALDH18A1, ALPK1, ATL1, ATL2, ATP11B, ATP11C, ATP1A4, ATP2B4, ATP7B, ATP9A, AURKB, BMS1, BMX, BRSK2, CAMK2G, CAMKK2, CAMKV, CARNS1, CCPG1, CDC42BPG, CDK12, CDK13, CDK19, CENPE, CHEK2, CHUK, CIITA, CIT, CSNK1A1, DDR2, DDX58, DGUOK, DHX30, DHX32, DMC1, DNHD1, DYNC2H1, DYRK3, EIF4G1, EPHB1, EPHB4, FGD4, FGFR4, FGR, FPGS, GNAL, GNAQ,…
GO:0043085	positive regulation of catalytic activity	GO_BiologicalProcess-EBI-UniProt-GOA-ACAP-ARAP_16.06.2020_00h00	0.000227892	0.00743554	1.22473e-07	1.10225e-06	[4]	Group49	9.53947	87	[AGAP2, AGFG1, APH1B, ARHGAP26, ARHGAP9, ARHGEF10, ATP1B2, ATP2B4, CARD8, CASP8, CCNY, CDH3, CENPE, CHM, DAXX, DBF4, DCUN1D2, DCUN1D3, DCUN1D4, DDR2, DOK7, DYNC1I2, ELMOD2, EPHB1, EPHB4, ETAA1, F11R, FGF13, FGFR4, FGR, FN1, GIT2, GNAQ, HMBOX1, HNRNPD, IGF2, IL18, LOC101086801, LOC101091160, LOC101093602, LPAR1, LYN, MAP3K1, MAP3K11, MAPK8IP3, MYO9A, MYO9B, NCAPG2, NEK10, NEK4, NPRL3, OCRL, OSBPL2…
GO:0043412	macromolecule modification	GO_BiologicalProcess-EBI-UniProt-GOA-ACAP-ARAP_16.06.2020_00h00	0.00372301	0.044569	1.22473e-07	1.10225e-06	[4]	Group49	7.66922	230	[AAK1, ACVR1, ADARB1, ALPK1, ARNTL, ARR3, ASPSCR1, ASXL1, ATE1, ATP2B4, AURKB, BMX, BRAT1, BRCA1, BRCA2, BRSK2, CAMK2G, CAMKK2, CAMKV, CAPN3, CAV2, CCNY, CD36, CDC14B, CDC42BPG, CDCA2, CDK12, CDK13, CDK19, CDKN3, CDON, CDYL, CENPE, CHEK2, CHM, CHUK, CIT, CMTR1, CSNK1A1, CTCF, CTDP1, CTDSPL, CTTNBP2NL, CUL4B, DAXX, DBF4, DCAF1, DCAF11, DCUN1D2, DCUN1D3, DCUN1D4, DDR2, DNMT3A, DOK7, DPF1, DPF2, DPY…
GO:0017076	purine nucleotide binding	GO_MolecularFunction-EBI-UniProt-GOA-ACAP-ARAP_16.06.2020_00h00	5.50743e-06	0.000610958	1.22473e-07	1.10225e-06	[4, 5]	Group49	9.33852	144	[AAK1, ABCC2, ABCC5, ABCD3, ABCG4, ACACA, ACBD4, ACVR1, ADCY6, ADSS, AGAP2, ALDH18A1, ALPK1, ATL1, ATL2, ATP11B, ATP11C, ATP1A4, ATP2B4, ATP7B, ATP9A, AURKB, BMS1, BMX, BRSK2, CAMK2G, CAMKK2, CAMKV, CARNS1, CCPG1, CDC42BPG, CDK12, CDK13, CDK19, CENPE, CHEK2, CHM, CHUK, CIITA, CIT, CSNK1A1, DDR2, DDX58, DGUOK, DHX30, DHX32, DMC1, DNHD1, DYNC2H1, DYRK3, EIF4G1, EPHB1, EPHB4, FGD4, FGFR4, FGR, FPGS,…
GO:0036211	protein modification process	GO_BiologicalProcess-EBI-UniProt-GOA-ACAP-ARAP_16.06.2020_00h00	0.00145047	0.0229866	1.22473e-07	1.10225e-06	[4, 5]	Group49	7.83491	224	[AAK1, ACVR1, ADARB1, ALPK1, ARNTL, ARR3, ASPSCR1, ASXL1, ATE1, ATP2B4, AURKB, BMX, BRAT1, BRCA1, BRCA2, BRSK2, CAMK2G, CAMKK2, CAMKV, CAPN3, CAV2, CCNY, CD36, CDC14B, CDC42BPG, CDCA2, CDK12, CDK13, CDK19, CDKN3, CDON, CDYL, CENPE, CHEK2, CHM, CHUK, CIT, CSNK1A1, CTCF, CTDP1, CTDSPL, CTTNBP2NL, CUL4B, DAXX, DBF4, DCAF1, DCAF11, DCUN1D2, DCUN1D3, DCUN1D4, DDR2, DOK7, DPF1, DPF2, DPY19L4, DUSP8, DY…
GO:0032555	purine ribonucleotide binding	GO_MolecularFunction-EBI-UniProt-GOA-ACAP-ARAP_16.06.2020_00h00	6.5585e-06	0.000682084	1.22473e-07	1.10225e-06	[4, 5, 6]	Group49	9.32203	143	[AAK1, ABCC2, ABCC5, ABCD3, ABCG4, ACACA, ACBD4, ACVR1, ADCY6, ADSS, AGAP2, ALDH18A1, ALPK1, ATL1, ATL2, ATP11B, ATP11C, ATP1A4, ATP2B4, ATP7B, ATP9A, AURKB, BMS1, BMX, BRSK2, CAMK2G, CAMKK2, CAMKV, CARNS1, CCPG1, CDC42BPG, CDK12, CDK13, CDK19, CENPE, CHEK2, CHM, CHUK, CIITA, CIT, CSNK1A1, DDR2, DDX58, DGUOK, DHX30, DHX32, DMC1, DNHD1, DYNC2H1, DYRK3, EIF4G1, EPHB1, EPHB4, FGD4, FGFR4, FGR, FPGS,…
GO:0051347	positive regulation of transferase activity	GO_BiologicalProcess-EBI-UniProt-GOA-ACAP-ARAP_16.06.2020_00h00	0.000848021	0.0172086	1.22473e-07	1.10225e-06	[5]	Group49	10.6635	45	[ATP2B4, CCNY, CENPE, DAXX, DBF4, DCUN1D2, DCUN1D3, DCUN1D4, DDR2, DOK7, EPHB1, EPHB4, ETAA1, FGF13, FGFR4, FGR, HMBOX1, HNRNPD, IGF2, IL18, LOC101091160, LPAR1, LYN, MAP3K1, MAP3K11, MAPK8IP3, NCAPG2, NEK10, NEK4, P2RX7, PDGFB, PDPK1, PTK2, RAF1, RAPGEF2, RPTOR, SH3GLB1, SPAG9, SRC, STK24, STRADA, TIRAP, TOM1L1, VAV2, XRCC6]
GO:0006464	cellular protein modification process	GO_BiologicalProcess-EBI-UniProt-GOA-ACAP-ARAP_16.06.2020_00h00	0.00145047	0.0229866	1.22473e-07	1.10225e-06	[5, 6]	Group49	7.83491	224	[AAK1, ACVR1, ADARB1, ALPK1, ARNTL, ARR3, ASPSCR1, ASXL1, ATE1, ATP2B4, AURKB, BMX, BRAT1, BRCA1, BRCA2, BRSK2, CAMK2G, CAMKK2, CAMKV, CAPN3, CAV2, CCNY, CD36, CDC14B, CDC42BPG, CDCA2, CDK12, CDK13, CDK19, CDKN3, CDON, CDYL, CENPE, CHEK2, CHM, CHUK, CIT, CSNK1A1, CTCF, CTDP1, CTDSPL, CTTNBP2NL, CUL4B, DAXX, DBF4, DCAF1, DCAF11, DCUN1D2, DCUN1D3, DCUN1D4, DDR2, DOK7, DPF1, DPF2, DPY19L4, DUSP8, DY…
GO:0030554	adenyl nucleotide binding	GO_MolecularFunction-EBI-UniProt-GOA-ACAP-ARAP_16.06.2020_00h00	1.47247e-06	0.000350026	1.22473e-07	1.10225e-06	[5, 6]	Group49	9.91207	124	[AAK1, ABCC2, ABCC5, ABCD3, ABCG4, ACACA, ACBD4, ACVR1, ADCY6, ALDH18A1, ALPK1, ATP11B, ATP11C, ATP1A4, ATP2B4, ATP7B, ATP9A, AURKB, BMX, BRSK2, CAMK2G, CAMKK2, CAMKV, CARNS1, CDC42BPG, CDK12, CDK13, CDK19, CENPE, CHEK2, CHUK, CIITA, CIT, CSNK1A1, DDR2, DDX58, DGUOK, DHX30, DHX32, DMC1, DNHD1, DYNC2H1, DYRK3, EIF4G1, EPHB1, EPHB4, FGFR4, FGR, FPGS, GPHN, GUCY2C, HIPK1, HIPK3, HSPH1, ICK, IDE, IRA…
GO:0016301	kinase activity	GO_BiologicalProcess-EBI-UniProt-GOA-ACAP-ARAP_16.06.2020_00h00	0.000493072	0.0124314	1.22473e-07	1.10225e-06	[6]	Group49	9.08257	99	[AAK1, ACVR1, ADARB1, ALDH18A1, ALPK1, ATP2B4, AURKB, BMX, BRSK2, CAMK2G, CAMKK2, CAMKV, CCNY, CDC42BPG, CDK12, CDK13, CDK19, CENPE, CHEK2, CHKA, CHUK, CIT, CSNK1A1, DAXX, DBF4, DCAF1, DDR2, DGUOK, DOK7, DUSP8, DYRK3, EPHB1, EPHB4, ETAA1, FGF13, FGFR4, FGGY, FGR, GK5, GNAQ, GUCY2C, HIPK1, HIPK3, HYKK, ICK, IGF2, IL18, IPMK, IRAK4, ITGB3, LOC101091160, LPAR1, LYN, MAK, MAP3K1, MAP3K11, MAPK6, MAPK…
GO:0032559	adenyl ribonucleotide binding	GO_MolecularFunction-EBI-UniProt-GOA-ACAP-ARAP_16.06.2020_00h00	1.9294e-06	0.000401315	1.22473e-07	1.10225e-06	[5, 6, 7]	Group49	9.87952	123	[AAK1, ABCC2, ABCC5, ABCD3, ABCG4, ACACA, ACBD4, ACVR1, ADCY6, ALDH18A1, ALPK1, ATP11B, ATP11C, ATP1A4, ATP2B4, ATP7B, ATP9A, AURKB, BMX, BRSK2, CAMK2G, CAMKK2, CAMKV, CARNS1, CDC42BPG, CDK12, CDK13, CDK19, CENPE, CHEK2, CHUK, CIITA, CIT, CSNK1A1, DDR2, DDX58, DGUOK, DHX30, DHX32, DMC1, DNHD1, DYNC2H1, DYRK3, EIF4G1, EPHB1, EPHB4, FGFR4, FGR, FPGS, GPHN, GUCY2C, HIPK1, HIPK3, ICK, IDE, IRAK4, KIF…
GO:0005524	ATP binding	GO_MolecularFunction-EBI-UniProt-GOA-ACAP-ARAP_16.06.2020_00h00	3.46634e-06	0.000480666	1.22473e-07	1.10225e-06	[5, 6, 7, 8]	Group49	9.84284	119	[AAK1, ABCC2, ABCC5, ABCD3, ABCG4, ACACA, ACVR1, ADCY6, ALDH18A1, ALPK1, ATP11B, ATP11C, ATP1A4, ATP2B4, ATP7B, ATP9A, AURKB, BMX, BRSK2, CAMK2G, CAMKK2, CAMKV, CARNS1, CDC42BPG, CDK12, CDK13, CDK19, CENPE, CHEK2, CHUK, CIITA, CIT, CSNK1A1, DDR2, DDX58, DGUOK, DHX30, DHX32, DMC1, DNHD1, DYNC2H1, DYRK3, EIF4G1, EPHB1, EPHB4, FGFR4, FGR, FPGS, GPHN, GUCY2C, HIPK1, HIPK3, ICK, IDE, IRAK4, KIF11, KIF…
GO:0004672	protein kinase activity	GO_BiologicalProcess-EBI-UniProt-GOA-ACAP-ARAP_16.06.2020_00h00	0.00198672	0.0292557	1.22473e-07	1.10225e-06	[7, 8]	Group49	8.99123	82	[AAK1, ACVR1, ADARB1, ALPK1, ATP2B4, AURKB, BMX, BRSK2, CAMK2G, CAMKK2, CAMKV, CCNY, CDC42BPG, CDK12, CDK13, CDK19, CENPE, CHEK2, CHUK, CIT, CSNK1A1, DAXX, DBF4, DCAF1, DDR2, DOK7, DUSP8, DYRK3, EPHB1, EPHB4, ETAA1, FGF13, FGFR4, FGR, GNAQ, GUCY2C, HIPK1, HIPK3, ICK, IGF2, IL18, IRAK4, ITGB3, LOC101091160, LPAR1, LYN, MAK, MAP3K1, MAP3K11, MAPK6, MAPK8IP3, MAST2, MAST3, MOK, MYLK, NCAPG2, NEK10, …
GO:0033674	positive regulation of kinase activity	GO_BiologicalProcess-EBI-UniProt-GOA-ACAP-ARAP_16.06.2020_00h00	0.00112071	0.019839	1.22473e-07	1.10225e-06	[6, 7, 8, 9]	Group49	10.8696	40	[ATP2B4, CCNY, CENPE, DAXX, DBF4, DDR2, DOK7, EPHB1, EPHB4, ETAA1, FGF13, FGFR4, FGR, IGF2, IL18, LOC101091160, LPAR1, LYN, MAP3K1, MAP3K11, MAPK8IP3, NCAPG2, NEK10, NEK4, P2RX7, PDGFB, PDPK1, PTK2, RAF1, RAPGEF2, RPTOR, SH3GLB1, SPAG9, SRC, STK24, STRADA, TIRAP, TOM1L1, VAV2, XRCC6]
GO:0022402	cell cycle process	GO_BiologicalProcess-EBI-UniProt-GOA-ACAP-ARAP_16.06.2020_00h00	3.29713e-05	0.00161365	1.2868e-12	2.8953e-11	[2, 3]	Group50	10.2662	81	[ACVR1, ANLN, APBB2, ARHGEF10, ATP2B4, AURKB, BIN1, BRCA1, BRCA2, BRSK2, CAMK2G, CAPN3, CB3H14orf39, CCDC155, CCNY, CCP110, CDC14B, CDCA5, CDKN3, CENPE, CEP250, CHEK2, CIT, CKAP5, CLASP1, CLASP2, CNTROB, CTDP1, CTDSPL, CUL4B, DBF4, DCTN3, DCUN1D3, DMC1, DYRK3, EIF4G1, EPS8, FHL1, FOXN3, HAUS3, HAUS5, HNRNPU, IRF1, JADE1, KANK2, KIF11, KIZ, KLHL13, LOC101091160, LOC101098170, MAD2L1BP, MAP3K11, MD…
GO:0044770	cell cycle phase transition	GO_BiologicalProcess-EBI-UniProt-GOA-ACAP-ARAP_16.06.2020_00h00	0.00126856	0.0213221	1.2868e-12	2.8953e-11	[3, 4]	Group50	11.5523	32	[ACVR1, ATP2B4, AURKB, BRCA1, BRSK2, CAMK2G, CCNY, CDC14B, CDCA5, CENPE, CHEK2, CTDP1, CTDSPL, CUL4B, DBF4, DCUN1D3, DYRK3, EIF4G1, EPS8, FHL1, FOXN3, JADE1, KANK2, MAD2L1BP, MAP3K11, MDM2, NACC2, NEK10, PDPN, RPTOR, USP44, ZNF207]
GO:0051726	regulation of cell cycle	GO_BiologicalProcess-EBI-UniProt-GOA-ACAP-ARAP_16.06.2020_00h00	0.00130441	0.0217053	1.2868e-12	2.8953e-11	[3, 4]	Group50	9.50355	67	[ADARB1, APBB2, ARNTL, ATP2B4, AURKB, BIN1, BRCA1, BRCA2, CABLES1, CCNY, CCP110, CDC14B, CDCA5, CDK12, CDK19, CDKN3, CENPE, CEP250, CHEK2, CIT, CTDSPL, CUL4B, DBF4, DCUN1D3, DYRK3, EIF4G1, ETAA1, FHL1, FOXN3, HNRNPU, IRF1, JADE1, KANK2, KIF11, KLHL13, LOC101091160, MAD2L1BP, MAP3K1, MDM2, MEIS2, NACC2, NEK10, NEK4, NUGGC, OBSL1, PARP3, PDGFB, PDPN, PPP1R13B, PRR11, PUM1, RAD9A, RNF112, RPTOR, SLF…
GO:1903047	mitotic cell cycle process	GO_BiologicalProcess-EBI-UniProt-GOA-ACAP-ARAP_16.06.2020_00h00	0.000965676	0.0184699	1.2868e-12	2.8953e-11	[3, 4]	Group50	10.3594	49	[ACVR1, ANLN, ARHGEF10, AURKB, BRCA1, BRCA2, BRSK2, CAMK2G, CCNY, CDC14B, CDCA5, CENPE, CHEK2, CIT, CKAP5, CLASP1, CLASP2, CNTROB, CTDP1, CTDSPL, CUL4B, DCUN1D3, EIF4G1, EPS8, FHL1, FOXN3, HNRNPU, JADE1, KANK2, KIF11, LOC101098170, MAD2L1BP, MDM2, NACC2, OBSL1, PARP3, PDGFB, PDPN, RAD9A, RPTOR, SLF2, SMC1A, SPICE1, TACC1, TOM1L1, USP16, USP44, ZNF207, ZWILCH]
GO:0010564	regulation of cell cycle process	GO_BiologicalProcess-EBI-UniProt-GOA-ACAP-ARAP_16.06.2020_00h00	0.000142157	0.00537613	1.2868e-12	2.8953e-11	[3, 4, 5]	Group50	11.5681	45	[ATP2B4, AURKB, BIN1, BRCA1, BRCA2, CCP110, CDC14B, CDCA5, CENPE, CEP250, CHEK2, CIT, CTDSPL, CUL4B, DBF4, DCUN1D3, DYRK3, EIF4G1, FHL1, FOXN3, HNRNPU, JADE1, KANK2, KIF11, KLHL13, LOC101091160, MAD2L1BP, MDM2, NACC2, NEK10, NUGGC, OBSL1, PARP3, PDGFB, PDPN, RNF112, RPTOR, SLF2, SMC1A, SPICE1, TOM1L1, TP73, USP44, XPO1, ZNF207]
GO:0015631	tubulin binding	GO_MolecularFunction-EBI-UniProt-GOA-ACAP-ARAP_16.06.2020_00h00	0.000303926	0.00936543	1.2868e-12	2.8953e-11	[4]	Group50	12.406	33	[BRCA2, CAMSAP2, CCDC66, CENPE, CKAP5, CLASP1, CLASP2, CLIP1, CLIP2, EML4, EML5, FGD4, HOOK2, HOOK3, HSPH1, JAKMIP3, KIF11, KIF16B, KIF1A, KIF1B, KIF27, KIF9, KIFC3, LOC101081807, LRRC49, MAP1B, MAP2, MAPT, REEP1, TRAF3IP1, TTBK2, TUBGCP5, ZNF207]
GO:0000226	microtubule cytoskeleton organization	GO_BiologicalProcess-EBI-UniProt-GOA-ACAP-ARAP_16.06.2020_00h00	2.70317e-05	0.00140565	1.2868e-12	2.8953e-11	[3, 6]	Group50	11.8605	51	[ARHGEF10, AURKB, BRCA1, BRCA2, BRSK2, CAMSAP2, CC2D2A, CCDC120, CCDC155, CCDC66, CCP110, CDC14B, CENPE, CEP250, CHEK2, CKAP5, CLASP1, CLASP2, CLIP1, CLIP2, CNTROB, EML4, HAUS3, HAUS5, HNRNPU, HOOK2, HOOK3, HYDIN, KIF11, KIZ, LOC101081807, LOC101101403, LRRC49, MAP1B, MAP2, MAPT, NCOR1, OBSL1, PARP3, PCM1, PHLDB1, PTK2, SMC1A, SPICE1, SPIRE1, TACC1, TTBK2, TTC26, TUBGCP5, XPO1, ZNF207]
GO:0007346	regulation of mitotic cell cycle	GO_BiologicalProcess-EBI-UniProt-GOA-ACAP-ARAP_16.06.2020_00h00	0.00378076	0.0446184	1.2868e-12	2.8953e-11	[4, 5]	Group50	10.2981	38	[AURKB, BRCA1, BRCA2, CDC14B, CDCA5, CENPE, CHEK2, CTDSPL, CUL4B, DCUN1D3, EIF4G1, FHL1, FOXN3, HNRNPU, JADE1, KANK2, KIF11, MAD2L1BP, MAP3K1, MDM2, MEIS2, NACC2, NEK4, OBSL1, PARP3, PDGFB, PDPN, RAD9A, RPTOR, SLF2, SMC1A, STK24, STRADA, TOM1L1, TP73, USP44, ZNF207, ZWILCH]
GO:0007051	spindle organization	GO_BiologicalProcess-EBI-UniProt-GOA-ACAP-ARAP_16.06.2020_00h00	4.08244e-05	0.001887	1.2868e-12	2.8953e-11	[3, 4, 7]	Group50	17.6991	20	[ARHGEF10, AURKB, CCDC155, CENPE, CHEK2, CKAP5, CLASP1, CLASP2, HAUS3, HAUS5, HNRNPU, KIF11, KIZ, NCOR1, PARP3, SMC1A, SPICE1, TACC1, TUBGCP5, ZNF207]
GO:0005815	microtubule organizing center	GO_CellularComponent-EBI-UniProt-GOA-ACAP-ARAP_16.06.2020_00h00	4.22491e-09	2.34342e-06	1.2868e-12	2.8953e-11	[2, 6, 7]	Group50	13.7374	68	[ADGRB2, ARHGEF10, ARMC9, AURKB, BRCA2, BRSK2, C2CD5, CAMSAP2, CCDC120, CCDC141, CCDC66, CCP110, CDC14B, CDC42BPG, CEP112, CEP250, CEP85L, CKAP5, CLASP1, CLASP2, CLIP1, CNTROB, CSNK1A1, CTDP1, DCTN4, DLG5, DPF2, DYNC1I2, DYRK3, DZIP1, EHBP1, FBXW11, HAUS3, HAUS5, HIPK1, HMBOX1, HNRNPU, HOOK2, HOOK3, ICK, IFT140, IQCB1, ITGB6, ITSN2, JADE1, KIZ, LOC101093537, MAK, MAP3K11, NME7, OBSL1, PCM1, PDE4D…
GO:0007010	cytoskeleton organization	GO_BiologicalProcess-EBI-UniProt-GOA-ACAP-ARAP_16.06.2020_00h00	4.24911e-09	1.76763e-06	1.2868e-12	2.8953e-11	[5]	Group50	11.334	113	[ABI2, ABLIM3, AFAP1, AGFG1, AMOTL2, ANLN, ARFGEF3, ARHGAP26, ARHGEF10, AURKB, BIN1, BRCA1, BRCA2, BRSK2, BRWD3, CAMSAP2, CAPN3, CC2D2A, CCDC120, CCDC155, CCDC66, CCP110, CDC14B, CDC42BPG, CDC42EP4, CENPE, CEP250, CHEK2, CIT, CKAP5, CLASP1, CLASP2, CLIP1, CLIP2, CNTROB, CSNK1A1, EHBP1, EML4, EPB41, EPB41L2, EPS8, EVL, F11R, FARP2, FGD4, FHOD1, FMNL2, GHSR, HAUS3, HAUS5, HNRNPU, HOOK2, HOOK3, HYDI…
GO:0008017	microtubule binding	GO_MolecularFunction-EBI-UniProt-GOA-ACAP-ARAP_16.06.2020_00h00	2.08756e-05	0.00119783	1.2868e-12	2.8953e-11	[5]	Group50	15.1042	29	[CAMSAP2, CCDC66, CENPE, CKAP5, CLASP1, CLASP2, CLIP1, CLIP2, EML4, EML5, FGD4, HOOK2, HOOK3, JAKMIP3, KIF11, KIF16B, KIF1A, KIF1B, KIF27, KIF9, KIFC3, MAP1B, MAP2, MAPT, REEP1, TRAF3IP1, TTBK2, TUBGCP5, ZNF207]
GO:0070925	organelle assembly	GO_BiologicalProcess-EBI-UniProt-GOA-ACAP-ARAP_16.06.2020_00h00	0.00116921	0.0200573	1.2868e-12	2.8953e-11	[5]	Group50	9.89583	57	[ABLIM3, AGFG1, ARHGEF10, ARMC9, CAPN3, CC2D2A, CCDC155, CCDC66, CCP110, CDC14B, CDKN3, CENPE, CEP250, CHEK2, CLASP1, CLASP2, CNTROB, DHX30, DYNC2H1, DZIP1, FARP2, HAUS3, HAUS5, HNRNPU, HYDIN, ICK, IFT140, IQCB1, KIF11, KIF27, KIF9, LDB3, LOC101101403, LRRC49, MAK, MBD1, MTMR3, NCOR1, NEBL, NPRL3, OCRL, P2RX7, PCM1, PTPRS, RAB7B, SH3GLB1, SMC1A, SPICE1, SRC, TBC1D32, TCTN1, TEKT1, TTBK2, TTC26, T…
GO:1901987	regulation of cell cycle phase transition	GO_BiologicalProcess-EBI-UniProt-GOA-ACAP-ARAP_16.06.2020_00h00	0.00317869	0.0403767	1.2868e-12	2.8953e-11	[4, 5, 6]	Group50	11.9403	24	[ATP2B4, AURKB, BRCA1, CDC14B, CDCA5, CENPE, CTDSPL, CUL4B, DBF4, DCUN1D3, DYRK3, EIF4G1, FHL1, FOXN3, JADE1, KANK2, MAD2L1BP, MDM2, NACC2, NEK10, PDPN, RPTOR, USP44, ZNF207]
GO:0140014	mitotic nuclear division	GO_BiologicalProcess-EBI-UniProt-GOA-ACAP-ARAP_16.06.2020_00h00	0.002132	0.0305832	1.2868e-12	2.8953e-11	[4, 5, 7]	Group50	12.5	23	[ARHGEF10, AURKB, CDC14B, CDCA5, CENPE, CHEK2, CLASP1, CLASP2, CTDP1, EPS8, HNRNPU, KIF11, LOC101098170, MAD2L1BP, OBSL1, PDGFB, SLF2, SMC1A, SPICE1, TOM1L1, USP16, USP44, ZNF207]
GO:1902850	microtubule cytoskeleton organization involved in mitosis	GO_BiologicalProcess-EBI-UniProt-GOA-ACAP-ARAP_16.06.2020_00h00	0.00283483	0.0377372	1.2868e-12	2.8953e-11	[4, 5, 7]	Group50	15.0538	14	[ARHGEF10, AURKB, CENPE, CHEK2, CKAP5, CLASP1, CLASP2, HNRNPU, KIF11, PARP3, SMC1A, SPICE1, TACC1, ZNF207]
GO:0015630	microtubule cytoskeleton	GO_CellularComponent-EBI-UniProt-GOA-ACAP-ARAP_16.06.2020_00h00	1.67618e-09	1.39458e-06	1.2868e-12	2.8953e-11	[5, 6]	Group50	12.1554	97	[ADGRB2, ARHGEF10, ARMC9, AURKB, BRCA2, BRSK2, C2CD5, CAMSAP2, CCDC120, CCDC141, CCDC155, CCDC66, CCP110, CDC14B, CDC42BPG, CDC42EP4, CENPE, CEP112, CEP250, CEP85L, CKAP5, CLASP1, CLASP2, CLIP1, CLIP2, CNTROB, CSNK1A1, CTDP1, DCTN3, DCTN4, DLG5, DNHD1, DPF2, DYNC1I2, DYNC2H1, DYRK3, DZIP1, EHBP1, EML4, EPB41, FBXW11, HAUS3, HAUS5, HIPK1, HMBOX1, HNRNPU, HOOK2, HOOK3, HSPH1, ICK, IFT140, IKBKG, IQ…
GO:0051493	regulation of cytoskeleton organization	GO_BiologicalProcess-EBI-UniProt-GOA-ACAP-ARAP_16.06.2020_00h00	0.00452536	0.0485819	1.2868e-12	2.8953e-11	[5, 6]	Group50	10.1877	38	[AFAP1, ARHGEF10, BIN1, CAMSAP2, CCP110, CDC42EP4, CEP250, CKAP5, CLASP1, CLASP2, CLIP1, EPS8, EVL, F11R, FHOD1, HNRNPU, ITGB3, KANK1, KIAA1211, KIF11, LIMCH1, LPAR1, MAP1B, MAPT, NCKAP1, NEXN, PARP3, PHLDB1, PLEKHG2, PLXNB1, RAC2, SMC1A, SORBS3, SPICE1, SPIRE1, TTBK2, WIPF2, XPO1]
GO:0070507	regulation of microtubule cytoskeleton organization	GO_BiologicalProcess-EBI-UniProt-GOA-ACAP-ARAP_16.06.2020_00h00	0.00448575	0.0491071	1.2868e-12	2.8953e-11	[4, 5, 6, 7]	Group50	13.1783	17	[CAMSAP2, CCP110, CEP250, CKAP5, CLASP1, CLASP2, CLIP1, HNRNPU, KIF11, MAP1B, MAPT, PARP3, PHLDB1, SMC1A, SPICE1, TTBK2, XPO1]
GO:0007052	mitotic spindle organization	GO_BiologicalProcess-EBI-UniProt-GOA-ACAP-ARAP_16.06.2020_00h00	0.000127493	0.00493368	1.2868e-12	2.8953e-11	[4, 5, 6, 8]	Group50	20.2899	14	[ARHGEF10, AURKB, CENPE, CHEK2, CKAP5, CLASP1, CLASP2, HNRNPU, KIF11, PARP3, SMC1A, SPICE1, TACC1, ZNF207]
GO:0051225	spindle assembly	GO_BiologicalProcess-EBI-UniProt-GOA-ACAP-ARAP_16.06.2020_00h00	0.000175639	0.00608882	1.2868e-12	2.8953e-11	[4, 5, 6, 8]	Group50	19.7183	14	[ARHGEF10, CCDC155, CHEK2, CLASP1, CLASP2, HAUS3, HAUS5, HNRNPU, KIF11, NCOR1, SMC1A, SPICE1, TUBGCP5, ZNF207]
GO:0005874	microtubule	GO_CellularComponent-EBI-UniProt-GOA-ACAP-ARAP_16.06.2020_00h00	0.00113627	0.0199026	1.2868e-12	2.8953e-11	[6, 7]	Group50	12.5	26	[AURKB, CAMSAP2, CCDC66, CENPE, CKAP5, CLASP1, CLASP2, CLIP1, CLIP2, DYNC1I2, DYNC2H1, HNRNPU, HSPH1, KIF11, KIF16B, KIF1A, KIF27, KIF9, KIFC3, MAP1B, MAP2, MAP3K11, MAPT, RADIL, REEP1, TUBGCP5]
GO:0072686	mitotic spindle	GO_CellularComponent-EBI-UniProt-GOA-ACAP-ARAP_16.06.2020_00h00	0.000703802	0.0154096	1.2868e-12	2.8953e-11	[5, 6, 7, 8]	Group50	16.6667	15	[CDC14B, CENPE, CLASP1, CLASP2, EML4, EPB41, HAUS3, HNRNPU, IKBKG, IQCB1, KIF11, MAK, MAPKBP1, NCOR1, SMC1A]
GO:0090307	mitotic spindle assembly	GO_BiologicalProcess-EBI-UniProt-GOA-ACAP-ARAP_16.06.2020_00h00	0.000925338	0.0179042	1.2868e-12	2.8953e-11	[5, 6, 7, 8, 9]	Group50	22.5	9	[ARHGEF10, CHEK2, CLASP1, CLASP2, HNRNPU, KIF11, SMC1A, SPICE1, ZNF207]
GO:0030991	intraciliary transport particle A	GO_CellularComponent-EBI-UniProt-GOA-ACAP-ARAP_16.06.2020_00h00	0.00482737	0.0492807	1.59797e-07	1.19847e-06	[2, 3]	Group51	50	3	[IFT140, TTC21A, WDR19]
GO:0050793	regulation of developmental process	GO_BiologicalProcess-EBI-UniProt-GOA-ACAP-ARAP_16.06.2020_00h00	0.00343818	0.0423787	1.59797e-07	1.19847e-06	[2, 3]	Group51	8.18571	134	[ACVR1, ADGRB2, AGAP2, ARNTL, ASXL1, ATP11C, ATP2B4, BIN1, BRCA1, BRCA2, BRSK2, BRWD3, CAMK2G, CAMSAP2, CAPN3, CD36, CDC42EP4, CDH3, CDK12, CDK13, CDON, CMKLR1, CRB2, DDR2, DLG5, EIF4G1, ELL3, EPB41, EPHB1, EPS8, F11R, FGR, FMNL2, FN1, FSTL4, GHSR, GTF2I, HNF1B, HOOK3, HSF4, IGF2, IL18, IQCB1, IRF1, ITGB3, ITSN2, KRIT1, LDLRAD4, LOC101091160, LOXL3, LPAR1, LRRC24, LYN, MAPK6, MAPK8IP3, MAPT, MBNL…
GO:0007018	microtubule-based movement	GO_BiologicalProcess-EBI-UniProt-GOA-ACAP-ARAP_16.06.2020_00h00	0.000681218	0.015114	1.59797e-07	1.19847e-06	[3]	Group51	12.9353	26	[AP3B2, CENPE, DNHD1, DYNC1I2, DYNC2H1, HYDIN, ICK, IFT140, KIF11, KIF16B, KIF1A, KIF1B, KIF27, KIF9, KIFC3, MAK, MAP1B, MAPK8IP3, MBD1, PCM1, TEKT1, TMEM201, TRAK1, TTC21A, TTC26, WDR19]
GO:0016043	cellular component organization	GO_BiologicalProcess-EBI-UniProt-GOA-ACAP-ARAP_16.06.2020_00h00	5.34789e-06	0.000635635	1.59797e-07	1.19847e-06	[3]	Group51	8.05617	327	[AAK1, ABCD3, ABI2, ABLIM3, ACACA, ACP2, ADARB1, ADGRB2, AFAP1, AFF2, AGFG1, ALDH1A2, AMOTL2, ANKRD13D, ANLN, ANO9, APBA1, APBB2, ARFGEF3, ARHGAP26, ARHGEF10, ARMC9, ASXL1, ATL1, ATL2, ATP11B, ATP11C, ATP9A, AURKB, BIN1, BRAT1, BRCA1, BRCA2, BRSK2, BRWD3, C2CD5, CACNB2, CAMK2G, CAMKV, CAMSAP2, CAPN3, CAV2, CB3H14orf39, CC2D2A, CCDC120, CCDC141, CCDC155, CCDC66, CCP110, CD36, CDC14B, CDC42BPG, CDC…
GO:0120025	plasma membrane bounded cell projection	GO_CellularComponent-EBI-UniProt-GOA-ACAP-ARAP_16.06.2020_00h00	0.000869039	0.0174227	1.59797e-07	1.19847e-06	[3]	Group51	8.83838	105	[ABI2, ABLIM3, ADAM22, ADGRL2, ANLN, AP3B2, APBA2, ARMC9, ARR3, ATP2B4, BIN1, BMX, C2CD5, CAMK2G, CC2D2A, CCDC120, CCDC141, CCDC66, CD36, CHRNG, CPEB3, CSNK1A1, DDX58, DLG4, DLG5, DYNC2H1, DZIP1, EEA1, EPHB1, EPS8, EPS8L1, EPS8L2, EVL, FGR, GHSR, GPHN, GPR179, HEPACAM, HYDIN, ICK, IFT140, IGSF9, INPP5K, IQCB1, JADE1, KCNAB1, KCNJ10, KCNQ2, KIF1A, KIF1B, KIF27, LOC101081807, LOC101091160, LOC10110…
GO:0000902	cell morphogenesis	GO_BiologicalProcess-EBI-UniProt-GOA-ACAP-ARAP_16.06.2020_00h00	0.00205121	0.0299405	1.59797e-07	1.19847e-06	[3, 4]	Group51	9.3617	66	[ADARB1, APBB2, ASXL1, BRSK2, BRWD3, CCDC141, CDC42EP4, CSNK1A1, DLG4, EPB41, EPHB1, EPS8, F11R, FERMT2, FGR, FMNL2, FN1, FRY, FRYL, FSTL4, ITGB3, ITSN2, LOC101091160, LPAR1, MAP1B, MAPK8IP3, MAPT, MKLN1, MYO10, NBEAL2, NEDD4L, NEXN, NYAP2, OBSL1, P2RX7, P2RY1, PALLD, PALM, PDPN, PLXNA2, PLXNB1, PLXNB3, PTK2, PTPRS, RAC2, RADIL, RAPGEF2, RBFOX2, RTN4, SEMA3G, SEMA4D, SH3KBP1, SLC11A2, SRC, SYNGAP…
GO:0022603	regulation of anatomical structure morphogenesis	GO_BiologicalProcess-EBI-UniProt-GOA-ACAP-ARAP_16.06.2020_00h00	0.00255662	0.0345871	1.59797e-07	1.19847e-06	[3, 4]	Group51	9.39394	62	[ACVR1, ADGRB2, ATP2B4, BRCA1, BRSK2, BRWD3, CD36, CDC42EP4, CRB2, EPB41, EPS8, F11R, FGR, FMNL2, FN1, FSTL4, GTF2I, HNF1B, ITGB3, ITSN2, KRIT1, LOC101091160, LPAR1, MAPT, MFF, MKLN1, MYO10, NEDD4L, OBSL1, P2RY1, PALM, PDPK1, PDPN, PHLDB1, PLEKHA4, PLXNA2, PLXNB1, PLXNB3, PPARG, PTK2, PTPRS, RAC2, RAPGEF2, RTN4, RUNX2, RXRA, SEMA3G, SEMA4D, SH3KBP1, SPIRE1, SRC, STAB1, SYNGAP1, SYT2, SYT3, TIAM1,…
GO:0051128	regulation of cellular component organization	GO_BiologicalProcess-EBI-UniProt-GOA-ACAP-ARAP_16.06.2020_00h00	0.000379538	0.0108888	1.59797e-07	1.19847e-06	[3, 4]	Group51	8.69854	131	[AAK1, ADGRB2, AFAP1, ANKRD13D, ANLN, APBB2, ARHGEF10, AURKB, BIN1, BRAT1, BRCA1, BRSK2, C2CD5, CAMK2G, CAMKV, CAMSAP2, CCP110, CD36, CDC14B, CDC42EP4, CDCA5, CENPE, CEP250, CKAP5, CLASP1, CLASP2, CLIP1, CNTROB, CTCF, DCUN1D3, DDR2, DLG5, EIF4G1, EPHB1, EPS8, EPS8L1, EPS8L2, EVL, F11R, FARP2, FGD4, FGFR4, FHL1, FHOD1, FN1, FSTL4, GHSR, HMBOX1, HNRNPD, HNRNPK, HNRNPU, IFT140, IGSF9, ITGB3, ITSN2, …
GO:0006996	organelle organization	GO_BiologicalProcess-EBI-UniProt-GOA-ACAP-ARAP_16.06.2020_00h00	1.53888e-05	0.00102428	1.59797e-07	1.19847e-06	[4]	Group51	8.45714	222	[ABCD3, ABI2, ABLIM3, ACP2, AFAP1, AFF2, AGFG1, AMOTL2, ANLN, ARFGEF3, ARHGAP26, ARHGEF10, ARMC9, ASXL1, ATL1, ATL2, AURKB, BIN1, BRCA1, BRCA2, BRSK2, BRWD3, C2CD5, CAMSAP2, CAPN3, CAV2, CB3H14orf39, CC2D2A, CCDC120, CCDC155, CCDC66, CCP110, CDC14B, CDC42BPG, CDC42EP4, CDCA5, CDKN3, CENPE, CENPP, CEP250, CHEK2, CIT, CKAP5, CLASP1, CLASP2, CLIP1, CLIP2, CNTROB, COG2, CSNK1A1, CTCF, CTDP1, CUL4B, D…
GO:0022607	cellular component assembly	GO_BiologicalProcess-EBI-UniProt-GOA-ACAP-ARAP_16.06.2020_00h00	0.00110719	0.0200258	1.59797e-07	1.19847e-06	[4]	Group51	8.29215	151	[ABLIM3, ACACA, ADGRB2, AGFG1, ALDH1A2, ANLN, APBA1, ARHGEF10, ARMC9, ATL1, ATL2, BIN1, CAMSAP2, CAPN3, CAV2, CC2D2A, CCDC155, CCDC66, CCP110, CD36, CDC14B, CDC42EP4, CDKN3, CELF2, CENPE, CENPP, CEP250, CHEK2, CKAP5, CLASP1, CLASP2, CLIP1, CNTROB, CTCF, DAXX, DHX30, DLG4, DLG5, DMC1, DNMT3A, DYNC2H1, DZIP1, EIF3K, EIF4G1, EPHB1, EPS8, EPS8L1, EPS8L2, EVL, F11R, FAM172A, FARP2, FERMT2, FGD4, FHOD1…
GO:0030030	cell projection organization	GO_BiologicalProcess-EBI-UniProt-GOA-ACAP-ARAP_16.06.2020_00h00	3.82466e-05	0.00181835	1.59797e-07	1.19847e-06	[4]	Group51	9.85325	94	[ABLIM3, ADARB1, ANLN, APBB2, ARMC9, BRSK2, CAMK2G, CAMSAP2, CC2D2A, CCDC141, CCDC66, CCP110, CDC14B, CDC42EP4, CDKN3, CEP250, CNTROB, DLG4, DLG5, DYNC2H1, DZIP1, EPHB1, EPS8, EPS8L1, EPS8L2, EVL, FGD4, FN1, FRY, FSTL4, HYDIN, ICK, IFT140, IGSF9, IQCB1, ITSN2, KIF27, LOC101091160, LOC101101403, LPAR1, LRRC49, LYN, MAK, MAP1B, MAPK6, MAPK8IP3, MAPT, MBD1, MYLK, MYO10, NCKAP1, NEDD4L, NEXN, NYAP2, …
GO:0099111	microtubule-based transport	GO_BiologicalProcess-EBI-UniProt-GOA-ACAP-ARAP_16.06.2020_00h00	0.00306224	0.0401225	1.59797e-07	1.19847e-06	[4]	Group51	14.0351	16	[AP3B2, DYNC1I2, DYNC2H1, ICK, IFT140, KIF1B, KIF27, MAK, MAP1B, MAPK8IP3, PCM1, TMEM201, TRAK1, TTC21A, TTC26, WDR19]
GO:0000226	microtubule cytoskeleton organization	GO_BiologicalProcess-EBI-UniProt-GOA-ACAP-ARAP_16.06.2020_00h00	2.70317e-05	0.00140565	1.59797e-07	1.19847e-06	[3, 6]	Group51	11.8605	51	[ARHGEF10, AURKB, BRCA1, BRCA2, BRSK2, CAMSAP2, CC2D2A, CCDC120, CCDC155, CCDC66, CCP110, CDC14B, CENPE, CEP250, CHEK2, CKAP5, CLASP1, CLASP2, CLIP1, CLIP2, CNTROB, EML4, HAUS3, HAUS5, HNRNPU, HOOK2, HOOK3, HYDIN, KIF11, KIZ, LOC101081807, LOC101101403, LRRC49, MAP1B, MAP2, MAPT, NCOR1, OBSL1, PARP3, PCM1, PHLDB1, PTK2, SMC1A, SPICE1, SPIRE1, TACC1, TTBK2, TTC26, TUBGCP5, XPO1, ZNF207]
GO:0022604	regulation of cell morphogenesis	GO_BiologicalProcess-EBI-UniProt-GOA-ACAP-ARAP_16.06.2020_00h00	8.9509e-06	0.000876135	1.59797e-07	1.19847e-06	[4, 5]	Group51	13.4426	41	[BRSK2, BRWD3, CDC42EP4, EPB41, EPS8, F11R, FGR, FMNL2, FN1, FSTL4, ITGB3, ITSN2, LPAR1, MAPT, MKLN1, MYO10, NEDD4L, OBSL1, P2RY1, PALM, PDPN, PLXNA2, PLXNB1, PLXNB3, PTK2, PTPRS, RAC2, RAPGEF2, RTN4, SEMA3G, SEMA4D, SH3KBP1, SRC, SYNGAP1, SYT2, SYT3, TIAM1, UNC13A, WIPF2, ZMYM4, ZRANB1]
GO:0030705	cytoskeleton-dependent intracellular transport	GO_BiologicalProcess-EBI-UniProt-GOA-ACAP-ARAP_16.06.2020_00h00	7.46229e-05	0.00310431	1.59797e-07	1.19847e-06	[4, 5]	Group51	16.5354	21	[AP3B2, DYNC1I2, DYNC2H1, HOOK2, HOOK3, ICK, IFT140, KIF1A, KIF1B, MAK, MAP1B, MAPK8IP3, MYO1D, MYO5B, MYO5C, PCM1, TMEM201, TRAK1, TTC21A, TTC26, WDR19]
GO:0031344	regulation of cell projection organization	GO_BiologicalProcess-EBI-UniProt-GOA-ACAP-ARAP_16.06.2020_00h00	0.000155338	0.00561918	1.59797e-07	1.19847e-06	[4, 5]	Group51	11.4428	46	[ANLN, BRSK2, CAMK2G, CAMSAP2, CCP110, CDC42EP4, CNTROB, DLG5, EPS8, EPS8L1, EPS8L2, EVL, FN1, FSTL4, IFT140, ITSN2, LOC101091160, LPAR1, LYN, MAK, MAPK6, MAPT, MYO10, NCKAP1, NEDD4L, OBSL1, P2RX7, PALM, PDPN, PLXNA2, PLXNB1, PLXNB3, PTK2, PTPRS, RAP1GAP2, RAPGEF2, RTN4, SEMA3G, SEMA4D, SRC, STK24, SYNGAP1, SYT2, SYT3, TIAM1, UNC13A]
GO:0008360	regulation of cell shape	GO_BiologicalProcess-EBI-UniProt-GOA-ACAP-ARAP_16.06.2020_00h00	2.71353e-06	0.000501701	1.59797e-07	1.19847e-06	[3, 5, 6]	Group51	21.0526	20	[BRWD3, CDC42EP4, EPB41, EPS8, F11R, FGR, FMNL2, LPAR1, MKLN1, MYO10, P2RY1, PALM, PLXNA2, PLXNB1, PLXNB3, PTK2, RAC2, SEMA4D, SH3KBP1, WIPF2]
GO:0007010	cytoskeleton organization	GO_BiologicalProcess-EBI-UniProt-GOA-ACAP-ARAP_16.06.2020_00h00	4.24911e-09	1.76763e-06	1.59797e-07	1.19847e-06	[5]	Group51	11.334	113	[ABI2, ABLIM3, AFAP1, AGFG1, AMOTL2, ANLN, ARFGEF3, ARHGAP26, ARHGEF10, AURKB, BIN1, BRCA1, BRCA2, BRSK2, BRWD3, CAMSAP2, CAPN3, CC2D2A, CCDC120, CCDC155, CCDC66, CCP110, CDC14B, CDC42BPG, CDC42EP4, CENPE, CEP250, CHEK2, CIT, CKAP5, CLASP1, CLASP2, CLIP1, CLIP2, CNTROB, CSNK1A1, EHBP1, EML4, EPB41, EPB41L2, EPS8, EVL, F11R, FARP2, FGD4, FHOD1, FMNL2, GHSR, HAUS3, HAUS5, HNRNPU, HOOK2, HOOK3, HYDI…
GO:0030031	cell projection assembly	GO_BiologicalProcess-EBI-UniProt-GOA-ACAP-ARAP_16.06.2020_00h00	4.08227e-06	0.00052253	1.59797e-07	1.19847e-06	[5]	Group51	13.2184	46	[ABLIM3, ANLN, ARMC9, CC2D2A, CCDC66, CCP110, CDC14B, CDC42EP4, CDKN3, CEP250, CNTROB, DYNC2H1, DZIP1, EPS8, EPS8L1, EPS8L2, EVL, FGD4, HYDIN, ICK, IFT140, IQCB1, KIF27, LOC101101403, LPAR1, LRRC49, MAK, MBD1, MYLK, MYO10, NCKAP1, OCRL, P2RX7, PALM, PCM1, RAC2, RAPGEF2, SRC, TBC1D32, TCTN1, TEKT1, TSGA10, TTBK2, TTC26, VAV2, WDR19]
GO:0031346	positive regulation of cell projection organization	GO_BiologicalProcess-EBI-UniProt-GOA-ACAP-ARAP_16.06.2020_00h00	0.000916365	0.0179392	1.59797e-07	1.19847e-06	[4, 5, 6]	Group51	12.6829	26	[ANLN, CCP110, CDC42EP4, DLG5, EPS8, EPS8L1, EPS8L2, FN1, ITSN2, LOC101091160, LYN, MAPK6, MAPT, NCKAP1, OBSL1, P2RX7, PALM, PLXNA2, PLXNB1, PLXNB3, SEMA4D, SRC, SYT2, SYT3, TIAM1, UNC13A]
GO:0070925	organelle assembly	GO_BiologicalProcess-EBI-UniProt-GOA-ACAP-ARAP_16.06.2020_00h00	0.00116921	0.0200573	1.59797e-07	1.19847e-06	[5]	Group51	9.89583	57	[ABLIM3, AGFG1, ARHGEF10, ARMC9, CAPN3, CC2D2A, CCDC155, CCDC66, CCP110, CDC14B, CDKN3, CENPE, CEP250, CHEK2, CLASP1, CLASP2, CNTROB, DHX30, DYNC2H1, DZIP1, FARP2, HAUS3, HAUS5, HNRNPU, HYDIN, ICK, IFT140, IQCB1, KIF11, KIF27, KIF9, LDB3, LOC101101403, LRRC49, MAK, MBD1, MTMR3, NCOR1, NEBL, NPRL3, OCRL, P2RX7, PCM1, PTPRS, RAB7B, SH3GLB1, SMC1A, SPICE1, SRC, TBC1D32, TCTN1, TEKT1, TTBK2, TTC26, T…
GO:0120036	plasma membrane bounded cell projection organization	GO_BiologicalProcess-EBI-UniProt-GOA-ACAP-ARAP_16.06.2020_00h00	3.06476e-05	0.00154538	1.59797e-07	1.19847e-06	[5]	Group51	9.9359	93	[ABLIM3, ADARB1, ANLN, APBB2, ARMC9, BRSK2, CAMK2G, CAMSAP2, CC2D2A, CCDC141, CCDC66, CCP110, CDC14B, CDC42EP4, CDKN3, CEP250, CNTROB, DLG4, DLG5, DYNC2H1, DZIP1, EPHB1, EPS8, EPS8L1, EPS8L2, EVL, FGD4, FN1, FRY, FSTL4, HYDIN, ICK, IFT140, IGSF9, IQCB1, ITSN2, KIF27, LOC101091160, LOC101101403, LPAR1, LRRC49, LYN, MAK, MAP1B, MAPK6, MAPK8IP3, MAPT, MBD1, MYLK, MYO10, NCKAP1, NEDD4L, NEXN, NYAP2, …
GO:0010970	transport along microtubule	GO_BiologicalProcess-EBI-UniProt-GOA-ACAP-ARAP_16.06.2020_00h00	0.00191039	0.0283829	1.59797e-07	1.19847e-06	[5, 6]	Group51	15.1515	15	[AP3B2, DYNC1I2, DYNC2H1, ICK, IFT140, KIF1B, MAK, MAP1B, MAPK8IP3, PCM1, TMEM201, TRAK1, TTC21A, TTC26, WDR19]
GO:0044782	cilium organization	GO_BiologicalProcess-EBI-UniProt-GOA-ACAP-ARAP_16.06.2020_00h00	0.000651598	0.0148529	1.59797e-07	1.19847e-06	[5, 6]	Group51	12.4464	29	[ABLIM3, ARMC9, CC2D2A, CCDC66, CCP110, CDC14B, CDKN3, CEP250, CNTROB, DYNC2H1, DZIP1, HYDIN, ICK, IFT140, IQCB1, KIF27, LOC101101403, LRRC49, MAK, MBD1, OCRL, PCM1, TBC1D32, TCTN1, TEKT1, TTBK2, TTC21A, TTC26, WDR19]
GO:0051493	regulation of cytoskeleton organization	GO_BiologicalProcess-EBI-UniProt-GOA-ACAP-ARAP_16.06.2020_00h00	0.00452536	0.0485819	1.59797e-07	1.19847e-06	[5, 6]	Group51	10.1877	38	[AFAP1, ARHGEF10, BIN1, CAMSAP2, CCP110, CDC42EP4, CEP250, CKAP5, CLASP1, CLASP2, CLIP1, EPS8, EVL, F11R, FHOD1, HNRNPU, ITGB3, KANK1, KIAA1211, KIF11, LIMCH1, LPAR1, MAP1B, MAPT, NCKAP1, NEXN, PARP3, PHLDB1, PLEKHG2, PLXNB1, RAC2, SMC1A, SORBS3, SPICE1, SPIRE1, TTBK2, WIPF2, XPO1]
GO:0120035	regulation of plasma membrane bounded cell projection organization	GO_BiologicalProcess-EBI-UniProt-GOA-ACAP-ARAP_16.06.2020_00h00	0.000115846	0.00458969	1.59797e-07	1.19847e-06	[5, 6]	Group51	11.5869	46	[ANLN, BRSK2, CAMK2G, CAMSAP2, CCP110, CDC42EP4, CNTROB, DLG5, EPS8, EPS8L1, EPS8L2, EVL, FN1, FSTL4, IFT140, ITSN2, LOC101091160, LPAR1, LYN, MAK, MAPK6, MAPT, MYO10, NCKAP1, NEDD4L, OBSL1, P2RX7, PALM, PDPN, PLXNA2, PLXNB1, PLXNB3, PTK2, PTPRS, RAP1GAP2, RAPGEF2, RTN4, SEMA3G, SEMA4D, SRC, STK24, SYNGAP1, SYT2, SYT3, TIAM1, UNC13A]
GO:0061512	protein localization to cilium	GO_BiologicalProcess-EBI-UniProt-GOA-ACAP-ARAP_16.06.2020_00h00	0.00015428	0.00570494	1.59797e-07	1.19847e-06	[6]	Group51	25.641	10	[CC2D2A, CCDC66, DYNC2H1, IFT140, TBC1D32, TCTN1, TTC21A, TTC26, TULP2, WDR19]
GO:0120031	plasma membrane bounded cell projection assembly	GO_BiologicalProcess-EBI-UniProt-GOA-ACAP-ARAP_16.06.2020_00h00	1.6201e-05	0.00103686	1.59797e-07	1.19847e-06	[6]	Group51	12.8743	43	[ABLIM3, ANLN, ARMC9, CC2D2A, CCDC66, CCP110, CDC14B, CDC42EP4, CDKN3, CEP250, CNTROB, DYNC2H1, DZIP1, EPS8, EPS8L1, EPS8L2, EVL, FGD4, HYDIN, ICK, IFT140, IQCB1, KIF27, LOC101101403, LPAR1, LRRC49, MAK, MBD1, MYLK, MYO10, NCKAP1, OCRL, P2RX7, PALM, PCM1, RAPGEF2, TBC1D32, TCTN1, TEKT1, TTBK2, TTC26, VAV2, WDR19]
GO:0060271	cilium assembly	GO_BiologicalProcess-EBI-UniProt-GOA-ACAP-ARAP_16.06.2020_00h00	0.000331313	0.00984474	1.59797e-07	1.19847e-06	[6, 7]	Group51	13.1455	28	[ABLIM3, ARMC9, CC2D2A, CCDC66, CCP110, CDC14B, CDKN3, CEP250, CNTROB, DYNC2H1, DZIP1, HYDIN, ICK, IFT140, IQCB1, KIF27, LOC101101403, LRRC49, MAK, MBD1, OCRL, PCM1, TBC1D32, TCTN1, TEKT1, TTBK2, TTC26, WDR19]
GO:0099118	microtubule-based protein transport	GO_BiologicalProcess-EBI-UniProt-GOA-ACAP-ARAP_16.06.2020_00h00	0.000403527	0.0110077	1.59797e-07	1.19847e-06	[5, 6, 7, 8]	Group51	25	9	[DYNC2H1, ICK, IFT140, MAK, MAPK8IP3, PCM1, TTC21A, TTC26, WDR19]
GO:0003774	motor activity	GO_MolecularFunction-EBI-UniProt-GOA-ACAP-ARAP_16.06.2020_00h00	0.000799582	0.0166313	1.59797e-07	1.19847e-06	[7]	Group51	15	18	[CENPE, DNHD1, DYNC1I2, DYNC2H1, KIF11, KIF16B, KIF1A, KIF1B, KIF27, KIF9, KIFC3, LRRC49, MYO10, MYO1D, MYO5B, MYO5C, MYO9A, MYO9B]
GO:0045664	regulation of neuron differentiation	GO_BiologicalProcess-EBI-UniProt-GOA-ACAP-ARAP_16.06.2020_00h00	0.00409434	0.0469861	1.59797e-07	1.19847e-06	[5, 6, 7, 8, 9]	Group51	10.1828	39	[BIN1, BRSK2, CAMK2G, CAMSAP2, CDON, DLG5, EIF4G1, FN1, FSTL4, ITSN2, LOC101091160, LPAR1, LYN, MAPK6, MAPT, NEDD4L, OBSL1, PLXNA2, PLXNB1, PLXNB3, PTK2, PTPRS, RAP1GAP2, RAPGEF2, RNF112, RTN4, SEMA3G, SEMA4D, SPAG9, STK24, SYNGAP1, SYT2, SYT3, TCF12, TCF3, TCF4, TIAM1, UNC13A, ZNF536]
GO:0098840	protein transport along microtubule	GO_BiologicalProcess-EBI-UniProt-GOA-ACAP-ARAP_16.06.2020_00h00	0.000403527	0.0110077	1.59797e-07	1.19847e-06	[5, 6, 7, 8, 9]	Group51	25	9	[DYNC2H1, ICK, IFT140, MAK, MAPK8IP3, PCM1, TTC21A, TTC26, WDR19]
GO:0042073	intraciliary transport	GO_BiologicalProcess-EBI-UniProt-GOA-ACAP-ARAP_16.06.2020_00h00	0.000315314	0.00953969	1.59797e-07	1.19847e-06	[5, 6, 7, 8, 9, 10]	Group51	28.5714	8	[DYNC2H1, ICK, IFT140, MAK, PCM1, TTC21A, TTC26, WDR19]
GO:0045666	positive regulation of neuron differentiation	GO_BiologicalProcess-EBI-UniProt-GOA-ACAP-ARAP_16.06.2020_00h00	0.00474575	0.0490492	1.59797e-07	1.19847e-06	[5, 6, 7, 8, 9, 10]	Group51	11.7347	23	[CDON, DLG5, EIF4G1, FN1, ITSN2, LOC101091160, LYN, MAPK6, MAPT, OBSL1, PLXNA2, PLXNB1, PLXNB3, RNF112, SEMA4D, SPAG9, SYT2, SYT3, TCF12, TCF3, TCF4, TIAM1, UNC13A]
GO:0035721	intraciliary retrograde transport	GO_BiologicalProcess-EBI-UniProt-GOA-ACAP-ARAP_16.06.2020_00h00	5.66656e-05	0.00241773	1.59797e-07	1.19847e-06	[6, 7, 8, 9, 10, 11]	Group51	62.5	5	[DYNC2H1, ICK, IFT140, TTC21A, WDR19]
